1 **Upgraded CRISPR/Cas9 Tools for Tissue-Specific Mutagenesis in *Drosophila***

2 Gabriel T. Koreman<sup>1,2,5</sup>, Qinan Hu<sup>1,3,5</sup>, Yineng Xu<sup>1,2,5</sup>, Zijing Zhang<sup>1,4</sup>, Sarah E. Allen<sup>1</sup>, Mariana F.

3 Wolfner<sup>1</sup>, Bei Wang<sup>1,2\*</sup>, and Chun Han<sup>1,2\*</sup>

4 <sup>1</sup>Department of Molecular Biology and Genetics, Cornell University, Ithaca, NY 14853, USA

5 <sup>2</sup>Weill Institute for Cell and Molecular Biology, Cornell University, Ithaca, NY 14853, USA

6 <sup>3</sup>Current address: Department of Biology, Southern University of Science and Technology, Shenzhen,

7 Guangdong 518055, China

8 <sup>4</sup>Current address: Winthrop P. Rockefeller Cancer Institute, University of Arkansas for Medical

9 Sciences, Little Rock, AR 72205

10 <sup>5</sup>These authors contributed equally to this work

11 \*Correspondence: [bw447@cornell.edu](mailto:bw447@cornell.edu) (B.W.) and [chun.han@cornell.edu](mailto:chun.han@cornell.edu) (C.H.)

12 **RUNNING TITLE**

13 Improved CRISPR-TRiM tools in *Drosophila*

14

## 15 **ABSTRACT**

16 CRISPR/Cas9 has emerged as a powerful technology for tissue-specific mutagenesis. However,  
17 tissue-specific CRISPR/Cas9 tools currently available in *Drosophila* remain deficient in three significant  
18 ways. First, many existing gRNAs are inefficient, such that further improvements of gRNA expression  
19 constructs are needed for more efficient and predictable mutagenesis in both somatic and germline  
20 tissues. Second, it has been difficult to label mutant cells in target tissues with current methods. Lastly,  
21 application of tissue-specific mutagenesis at present often relies on Gal4-driven Cas9, which hampers  
22 the flexibility and effectiveness of the system. Here we tackle these deficiencies by building upon our  
23 previous CRISPR-mediated tissue restricted mutagenesis (CRISPR-TRiM) tools. First, we significantly  
24 improved gRNA efficiency in somatic tissues by optimizing multiplexed gRNA design. Similarly, we  
25 also designed efficient dual-gRNA vectors for the germline. Second, we developed methods to  
26 positively and negatively label mutant cells in tissue-specific mutagenesis by incorporating co-CRISPR  
27 reporters into gRNA expression vectors. Lastly, we generated genetic reagents for convenient  
28 conversion of existing Gal4 drivers into tissue-specific Cas9 lines based on homology-assisted CRISPR  
29 knock-in (HACK). In this way, we expand the choices of Cas9 for CRISPR-TRiM analysis to broader  
30 tissues and developmental stages. Overall, our upgraded CRISPR/Cas9 tools make tissue-specific  
31 mutagenesis more versatile, reliable, and effective in *Drosophila*. These improvements may be also  
32 applied to other model systems.

## 34 **KEYWORDS**

35 CRISPR/Cas9, CRISPR-TRiM, *Drosophila*, gRNA, co-CRISPR, HACK, da neurons, soma, germline,  
36 imaginal disc

## 38 **INTRODUCTION**

39 The ability to characterize gene function in a tissue-specific manner has been critical for studying  
40 developmental and disease mechanisms of essential genes. The clustered regularly interspaced short  
41 palindromic repeats (CRISPR)/Cas9 system has recently provided powerful tools for inducing tissue-  
42 specific gene loss of function (LOF). In this system, the endonuclease Cas9 is directed by a small guide  
43 RNA (gRNA) to a specific DNA sequence to create double-strand breaks (DSBs) (1). In the absence of  
44 homologous repair templates, DSBs are primarily repaired by non-homologous end joining (NHEJ), an  
45 error-prone process that often introduces mutations in the form of insertions or deletions (indels) (2, 3).

46 Because the protospacer adjacent motif (PAM) required for Cas9 action is ubiquitous in genomes (1, 4),  
47 by targeting the expression of Cas9 and gRNAs to specific tissues, mutations can be induced at virtually  
48 any gene in a tissue-specific manner. However, current tissue-specific CRISPR/Cas9 tools in *Drosophila*  
49 are still deficient in three areas, limiting the power of CRISPR/Cas9 in analyzing gene functions in  
50 broad tissues and biological processes.

51 Method of tissue-specific Cas9 delivery. In *Drosophila*, CRISPR/Cas9-mediated tissue-specific  
52 mutagenesis is generally achieved by two approaches that differ in the method of Cas9 delivery. The  
53 first approach uses a tissue-specific Gal4 to drive *UAS-Cas9* expression, and expresses gRNAs using  
54 either a ubiquitous or a UAS promoter (5, 6). The vast number of available tissue-specific Gal4 lines (1,  
55 7-9) makes adoption of this method relatively easy. For this reason, Gal4-driven Cas9s have been  
56 successfully used to elucidate gene functions, such as in circadian rhythm (10, 11), and to screen for new  
57 genes involved in neuronal remodeling (12).

58 The second method, CRISPR-mediated tissue-restricted mutagenesis (CRISPR-TRiM), relies on  
59 enhancer-driven Cas9 for tissue specificity, and employs ubiquitously expressed gRNAs (13). Compared  
60 to the *Gal4/UAS-Cas9* approach, CRISPR-TRiM has several advantages. First, enhancer-driven Cas9  
61 involves only one transcription step and thus requires less time for expression than Gal4-driven Cas9,  
62 reducing the chance of perduring gene products masking defects of mutant cells (13). Therefore,  
63 CRISPR-TRiM is more effective for studying early phenotypes of mutant cells. Second, enhancer-driven  
64 Cas9 is usually expressed at much lower levels than Gal4-driven Cas9, alleviating cytotoxicity  
65 associated with high Cas9 expression (13). Third, CRISPR-TRiM is a simpler system that requires only  
66 two genetic components, facilitating the construction of tissue-specific knockout strains with fewer  
67 time-consuming crosses. Lastly, CRISPR-TRiM allows simultaneous use of Gal4/UAS for manipulating  
68 other tissues. This flexibility of CRISPR-TRiM was demonstrated by simultaneous neuronal gene  
69 knockout (KO) and Gal4-dependent labeling of phosphatidylserine exposure in neurodegeneration (14).  
70 Until now, CRISPR-TRiM has been limited by the small number of tissue-specific Cas9 lines currently  
71 available. Wide applications of CRISPR-TRiM in *Drosophila* require efficient ways of generating new  
72 Cas9 lines that are specific to various tissues and developmental stages.

73 gRNA efficiency. Successful tissue-specific mutagenesis requires efficient transgenic gRNAs, as  
74 inefficient gRNAs would result in uneven LOF in the target tissue and complicate the analysis. A sound  
75 general strategy for improving gRNA efficiency is to optimize the design of gRNA expression vectors.  
76 So far, optimizations have been made mainly in two areas. First, since expressing multiple gRNAs

77 targeting a single gene can increase the likelihood of mutagenesis (5, 15), considerable efforts have been  
78 devoted to making multi-gRNA (multiplexed) expression vectors (5, 6, 16). Studies in rice, *Drosophila*,  
79 and yeast have demonstrated the effectiveness of tRNA-gRNA designs for the efficient expression and  
80 processing of multiplexed gRNAs (5, 17, 18). In these designs, multiple gRNAs are interspaced by  
81 glycine (G) tRNAs (tRNA<sup>Gly</sup>) in a single transcript under the control of a single promoter. Endogenous  
82 tRNA-processing enzymes cut out tRNAs from the transcript, simultaneously releasing individual  
83 gRNAs.

84 A second aspect of gRNA optimization concerns the scaffold sequence that forms hairpin loops  
85 to complex with Cas9 (1, 19). In an early study, a modified scaffold containing a flip of A-U positions  
86 and a stem-loop extension (F+E) was found to improve the targeting of Cas9 to the intended locus (20).  
87 More recently, an additional extension of the second stem-loop (gRNA2.1) was found to further increase  
88 the mutagenic efficiency of gRNAs in human cells (21). To develop general strategies for making highly  
89 efficient gRNAs for tissue-specific mutagenesis in *Drosophila*, we previously combined tRNA<sup>Gly</sup>-gRNA  
90 with the (F+E) gRNA scaffold in a transgenic gRNA vector. This vector performed much more  
91 efficiently than previous gRNA vector designs in somatic tissues (13). However, there is still room to  
92 further improve the design of gRNA vectors towards higher gRNA efficiency and more reliable tissue-  
93 specific mutagenesis. Moreover, the germline differs from the soma in important ways that often impact  
94 transgene expression (22, 23). It has thus been unknown which design is the most efficient in the  
95 *Drosophila* germline for use in germline mutagenesis and gene replacement through homology-directed  
96 repair (HDR).

97 Labeling of mutagenized cells. An unsolved caveat of all current methods of CRISPR-mediated  
98 mutagenesis is the inability to label mutant cells in the target tissue. This is particularly problematic for  
99 data analysis when Cas9 activity is not evenly distributed across all cells in the tissue of interest. This  
100 problem cannot be solved simply by fusing Cas9 to a fluorescent protein because the presence or  
101 absence of Cas9 protein at the time of analysis does not necessarily correlate with the presence or  
102 absence of mutations. Therefore, the ability to label mutant cells in the target tissue is an unmet need.

103 Here, we present our strategies to tackle these challenges. We report further improvements in the  
104 design of gRNA vectors that lead to higher gRNA efficiency and more reliable tissue-specific  
105 mutagenesis in somatic tissues. We also address germline performance of various constructs and report  
106 the most efficient vector for germline mutagenesis. Moreover, to label mutant cells, we developed a co-  
107 CRISPR reporter system and demonstrate its applications in mutagenizing the *Drosophila* epidermis in



108 conjunction with positive- and negative-labeling. Lastly, we generated genetic tools for convenient  
109 conversion of existing Gal4 lines into tissue-specific Cas9 lines. These new tools significantly increase  
110 the power of tissue-specific mutagenesis in *Drosophila* and make more reliable and more sophisticated  
111 CRISPR/Cas9 manipulations available for the study of broader biological questions.

112

## 113 **RESULTS**

### 114 **A new multi-gRNA design greatly improves the efficiency of somatic mutagenesis**

115 We previously identified an efficient multi-gRNA design (tgFE) that employs both tRNA<sup>Gly</sup> as spacers  
116 to separate gRNAs and the (F+E) gRNA scaffold to enhance gRNA/Cas9 interaction (13). We have  
117 continued to optimize this design to further increase its mutagenic efficiency. Reasoning that tRNA  
118 processing could affect the rate and level of gRNA production, we first tested alternative tRNAs in  
119 conjunction with the (F+E) gRNA scaffold. We compared six *Drosophila* tRNAs in a dual-gRNA  
120 design, in which a *Drosophila* tRNA<sup>Gly</sup> is followed by an irrelevant gRNA (targeting the blue  
121 fluorescent protein BFP) and a second variable tRNA is followed by a gRNA targeting *Syntaxin 5* (*Syx5*)  
122 (Figure 1C). We previously found in an RNAi screen that *Syx5* is required for dendrite growth of  
123 *Drosophila* class IV dendritic arborization (C4da) neurons (unpublished). Therefore, the most efficient  
124 gRNA construct should yield the most robust and consistent dendrite reduction (Figures 1A and 1B). For  
125 comparison, we used a tgFE-based dual-gRNA construct that expresses two gRNAs against *Syx5*  
126 (designated as GG). When combined with a C4da-specific Cas9 (*ppk-Cas9*), only the construct  
127 containing glutamine (Q) tRNA (tRNA<sup>Gln</sup>) consistently caused strong (59%) reduction of dendrite  
128 length, while other versions caused much more variable reductions as indicated by the deviation of each  
129 sample from the mean dendrite length (Figures 1C and 1D). As *Syx5* is required for ER to Golgi  
130 transport (24) and is likely expressed early in the neuronal lineage, we speculate that the variability of  
131 dendrite reduction is due to variable timings of mutagenesis in post-mitotic neurons. If so, incorporating  
132 tRNA<sup>Gln</sup> may have led to faster processing of multiplexed gRNAs and therefore a more consistent  
133 depletion of *Syx5* protein.

134 We further compared tRNA variants in a quadruple-gRNA design to knock out *Nsf1* and *Nsf2*  
135 simultaneously (Figure S1A-S1C); these genes act redundantly to permit dendrite growth of C4da  
136 neurons (13). However, using tRNA<sup>Gln</sup> in various combinations did not significantly enhance dendrite  
137 reduction (Figure S1D), possibly because the limiting factor in *Nsf1/Nsf2* neuronal KO is the timing of  
138 Cas9 expression rather than tRNA processing (13).

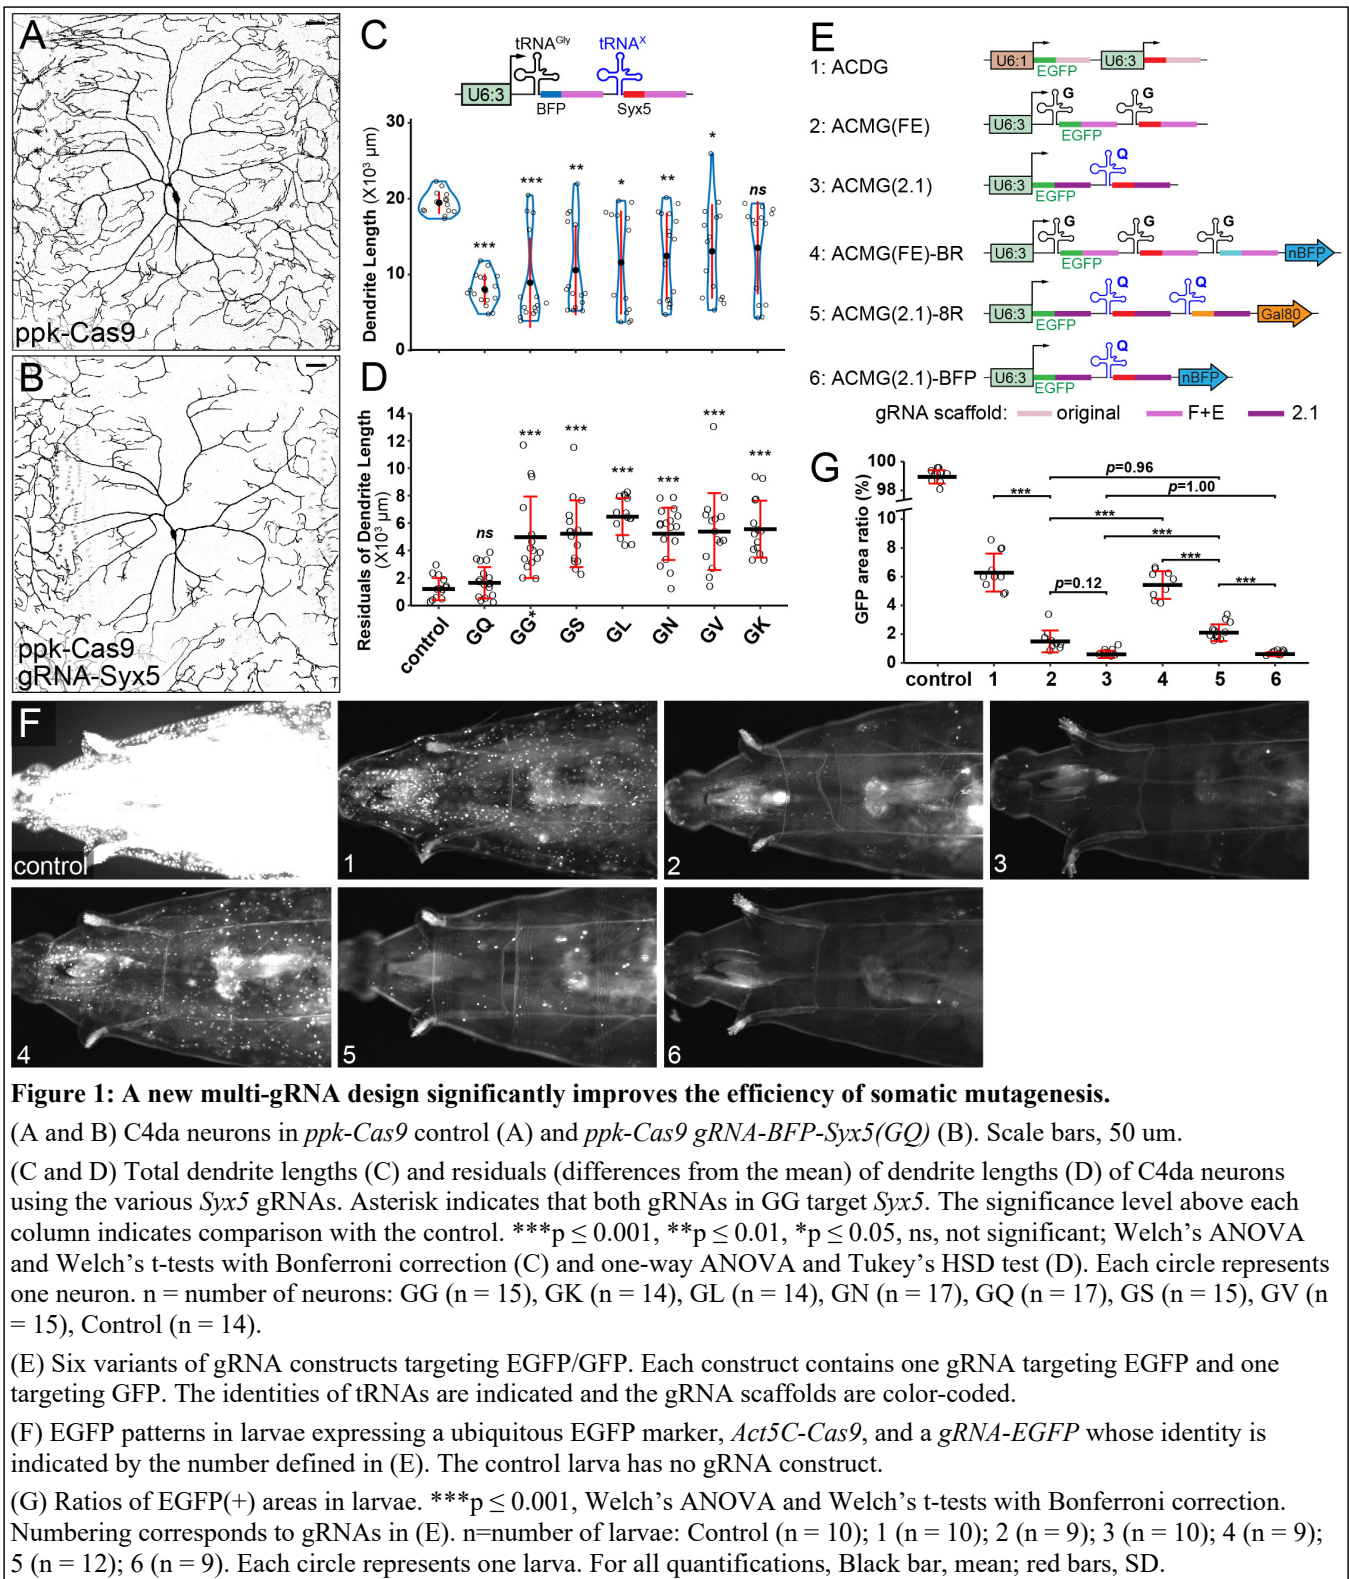

139

We next asked whether incorporating the gRNA2.1 scaffold could augment gRNA mutagenic

140

efficiency relative to the (F+E) scaffold. We generated a dual-gRNA construct against EGFP/GFP, with

141 tRNA<sup>Gln</sup> as the spacer and gRNA2.1 as the scaffold (Figure 1E, ACMG(2.1)), and compared it to two  
 142 earlier versions of gRNA-EGFP/GFP (Figure 1E, ACDG and ACMG(FE)). All three versions express  
 143 two gRNAs targeting EGFP and GFP coding sequences separately. ACDG uses two U6 promoters and  
 144 the original scaffold while ACMG(FE) is based on the tgFE design. Using a ubiquitous nuclear EGFP  
 145 and *Act5C-Cas9*, we assayed the efficiency of gRNAs in knocking out EGFP in larvae. Consistent with  
 146 our previous comparisons in da neurons (13), ACMG(FE) is significantly more efficient than ACDG:  
 147 While ACDG removed EGFP from most cells, there were still many EGFP-positive nuclei (6.28% area)  
 148 (Figures 1F and 1G). ACMG(FE) further reduced EGFP signals to only some muscle stripes and the  
 149 larval brain (1.49% area) (Figures 1F and 1G). In comparison, ACMG(2.1) almost completely  
 150 eliminated EGFP, leaving only occasional EGFP-positive cells (0.60% area) (Figures 1F and 1G). These  
 151 data suggest that tRNA<sup>Gln</sup>-gRNA2.1 (referred to as Qtg2.1) is a superior gRNA design over previous  
 152 generations.

153 It was unclear whether increasing the number of gRNAs in the multiplex design would impact  
 154 the efficiency of individual gRNAs. To answer this question, we added an extra irrelevant gRNA, along  
 155 with a ubiquitous reporter (described later), to ACMG(FE) and ACMG(2.1) constructs (Figure 1E,  
 156 ACMG(FE)-BR and ACMG(2.1)-8R, respectively). These two triple-gRNA constructs performed worse  
 157 than their dual-gRNA counterparts, although the new Qtg2.1 design was still consistently better than the  
 158 tgFE version (with 2.10% and 5.42% areas, respectively) (Figures 1F and 1G). The reduced efficiencies

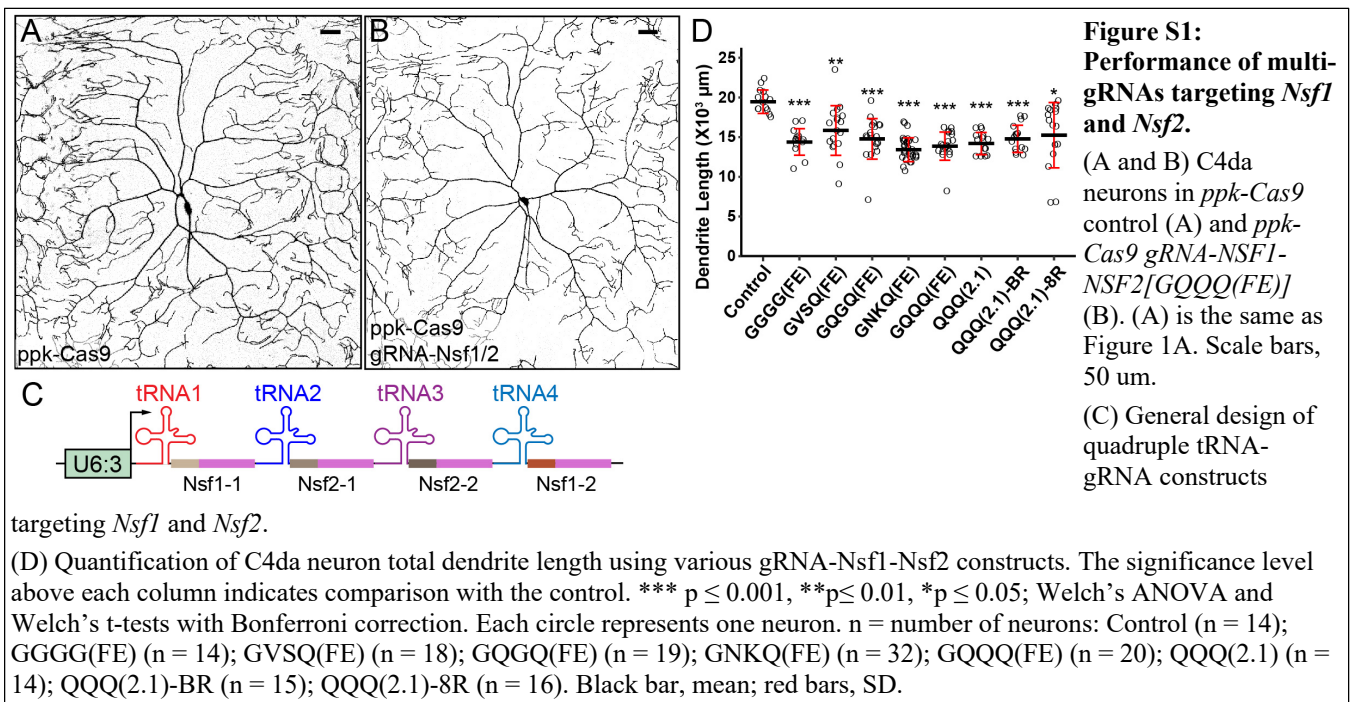

159 of triple-gRNA constructs were not due to the ubiquitous reporters, as adding only a reporter to  
160 ACMG(2.1) did not change the mutagenic efficiency (0.61% area) (Figures 1F and 1G). These data  
161 suggest that adding more gRNAs could reduce the efficiency of each gRNA in a multi-gRNA design,  
162 perhaps due to competition for Cas9.

163 We also tested the Qtg2.1 design in quadruple/quintuple gRNA constructs against *Nsf1/Nsf2*, but  
164 neither the Qtg2.1 design nor the addition of an irrelevant gRNA significantly affected the level of  
165 dendrite reduction in C4da neurons (Figure S1D). These results are consistent with the idea that Cas9  
166 expression timing, rather than the rate of gRNA production, is the limiting factor in this particular case  
167 (13).

168 In summary, we found that the Qtg2.1 gRNA design that incorporates tRNA<sup>Gln</sup> and the gRNA2.1  
169 scaffold significantly enhances mutagenic efficiency of multiplexed gRNAs.

### 170 **Co-CRISPR visualizes mutant cells in epithelial tissues**

171 The inability to label mutant cells has limited the analytic power of current methods of tissue-specific  
172 CRISPR mutagenesis. A possible solution is to incorporate a ubiquitous reporter, as well as a gRNA  
173 targeting the reporter, into the gRNA vector (Figure 2A). In such a co-CRISPR design, LOF of the gene  
174 of interest (GOI) could be correlated with the loss of reporter expression. As a proof of concept, we  
175 tested an EGFP/GFP gRNA construct that also carries a BFP gRNA and a ubiquitous nuclear BFP  
176 (nBFP) reporter (ACMG(FE)-BR in Figure 1E). This construct theoretically should allow negative  
177 labeling of *EGFP* mutant cells by the absence of BFP signal. Pairing this construct with ubiquitous  
178 nuclear EGFP, we examined the correlation of EGFP and BFP KO in larval epidermal cells (Figure 2C).  
179 We measured the ratio of EGFP and BFP double-positive cells in all EGFP-positive epidermal cells  
180 (overlap/EGFP ratio), which should have a value of 1 when mutagenesis of the two genes is correlated  
181 exactly. Deviations from this optimal ratio would be caused by false positives, where cells reporting  
182 CRISPR/Cas9 activity (the lack of BFP) still express functional EGFP.

183 We compared two Cas9 lines, *hh-Cas9* and *zk-Cas9*, which have distinct spatiotemporal  
184 expression patterns in the larval epidermis, in co-CRISPR labeling of *EGFP* KO cells. *hh-Cas9* is  
185 expected to be expressed in the posterior half of each segment from early embryogenesis to late larval  
186 stages (13, 25). While EGFP and BFP were completely knocked out in posterior hemi-segments by *hh-*  
187 *Cas9*, some anterior cells also lost either EGFP or BFP (Figure 2D), amounting to an overall  
188 overlap/EGFP ratio of 0.85 (Figure 2G). We also tested *hh-Cas9* in co-CRISPR in the wing imaginal  
189 disc, as it is expressed in the posterior compartment of the wing pouch (13). Similarly, we saw complete



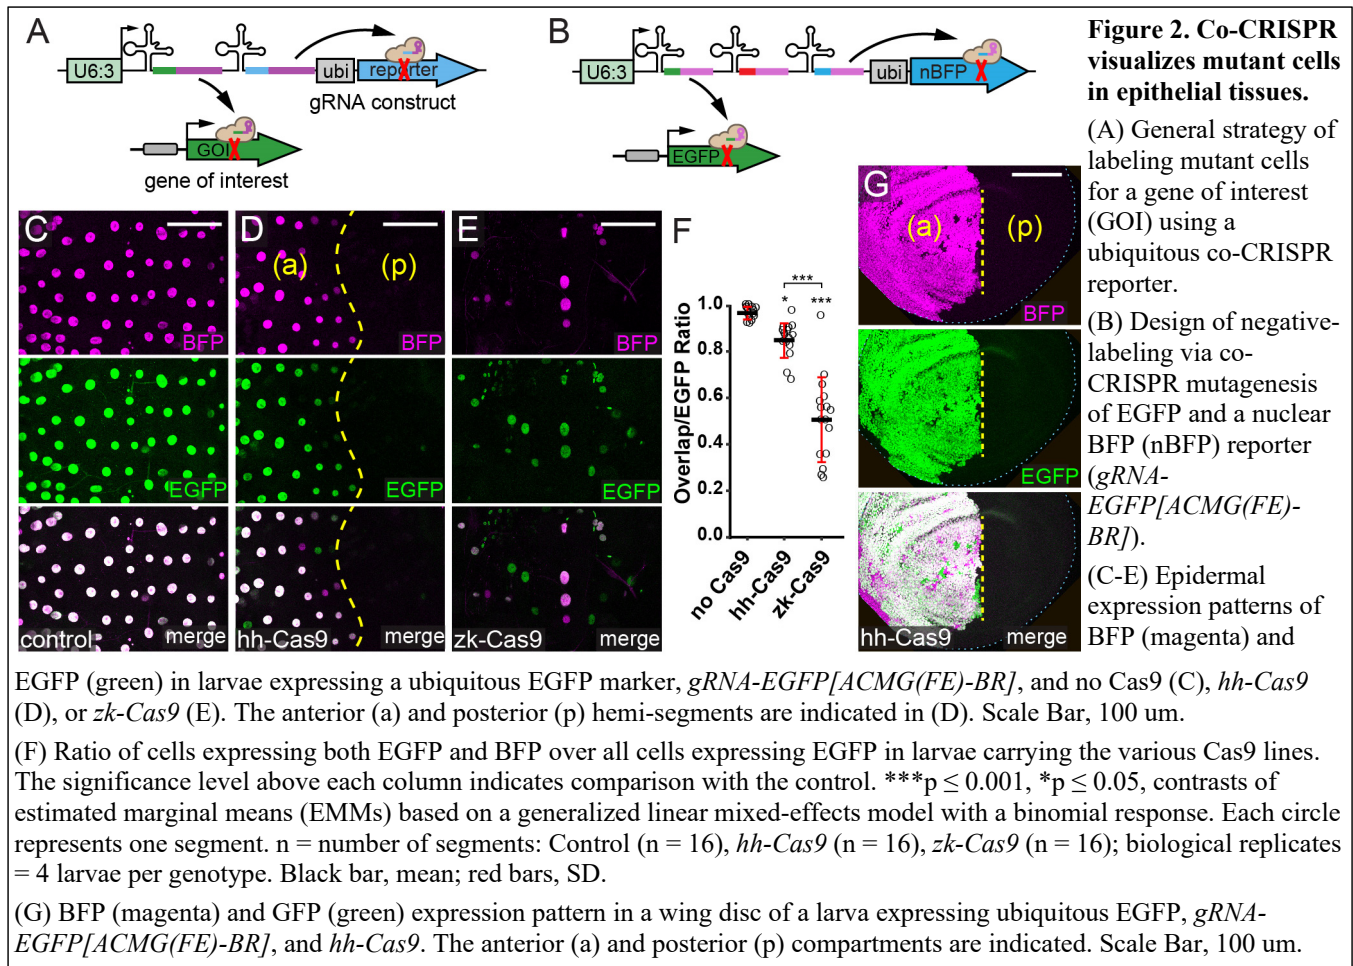

190 KO of both EGFP and BFP in the posterior wing disc as expected, and sporadic KO of either EGFP or  
 191 BFP in small, random patches in the anterior wing disc. The *hh-Cas9* activity in the anterior epidermal  
 192 hemi-segment and the anterior wing disc is likely due to leaky expression during development, which  
 193 should be transient and low. In comparison, the *zen-kr* enhancer in *zk-Cas9* is expected to drive transient  
 194 expression in precursor cells of epidermal cells during early embryogenesis (26-28). It knocked out  
 195 EGFP and BFP in some, but not all, epidermal cells (Figure 2E), generating an overlap/EGFP ratio of  
 196 0.51 (Figure 2F). These results suggest that reliable co-CRISPR requires (moderately) high and  
 197 persistent expression of Cas9 in the cell lineage, such as *hh-Cas9* in the posterior epidermal hemi-  
 198 segment and in the posterior compartment of the wing disc.

### 199 Co-CRISPR enables positive and negative labeling of mutant cells in dendrite development and 200 epithelial morphogenesis

201 To test if co-CRISPR can be used to visualize cells carrying biallelic mutations of endogenous genes, we  
 202 first designed a positive-labeling gRNA construct to target *sulfateless* (*sfl*), which encodes a heparan  
 203 sulfate-glucosamine N-sulfotransferase required by epidermal cells to support local growth of C4da

204 dendrites (28). Besides expressing two gRNAs targeting *sfl*, this gRNA construct also carries a gRNA  
 205 against *Gal80* and a ubiquitously expressed Gal80 reporter (Figure 3A). As Gal80 suppresses Gal4  
 206 transcription factor activity (29), the loss of *Gal80* can be visualized by Gal4-driven expression of a  
 207 fluorescent marker, thus enabling positive labeling of *sfl* mutant cells. We paired this construct with *hh-*  
 208 *Cas9*, *UAS-tdTom*, and a pan-epidermal Gal4 driver. Accordingly, we observed that tdTom-positive  
 209 epidermal cells in the posterior hemi-segment lacked coverage by high order dendritic branches of C4da  
 210 neurons (Figure 3B), a phenotype associated with epidermal *sfl* LOF (28). Although some tdTom-  
 211 positive cells were also observed in the anterior hemi-segment next to the segment boundary, reflecting  
 212 leaky expression of *hh-Cas9*, high order branches of C4da neurons were also absent from these tdTom

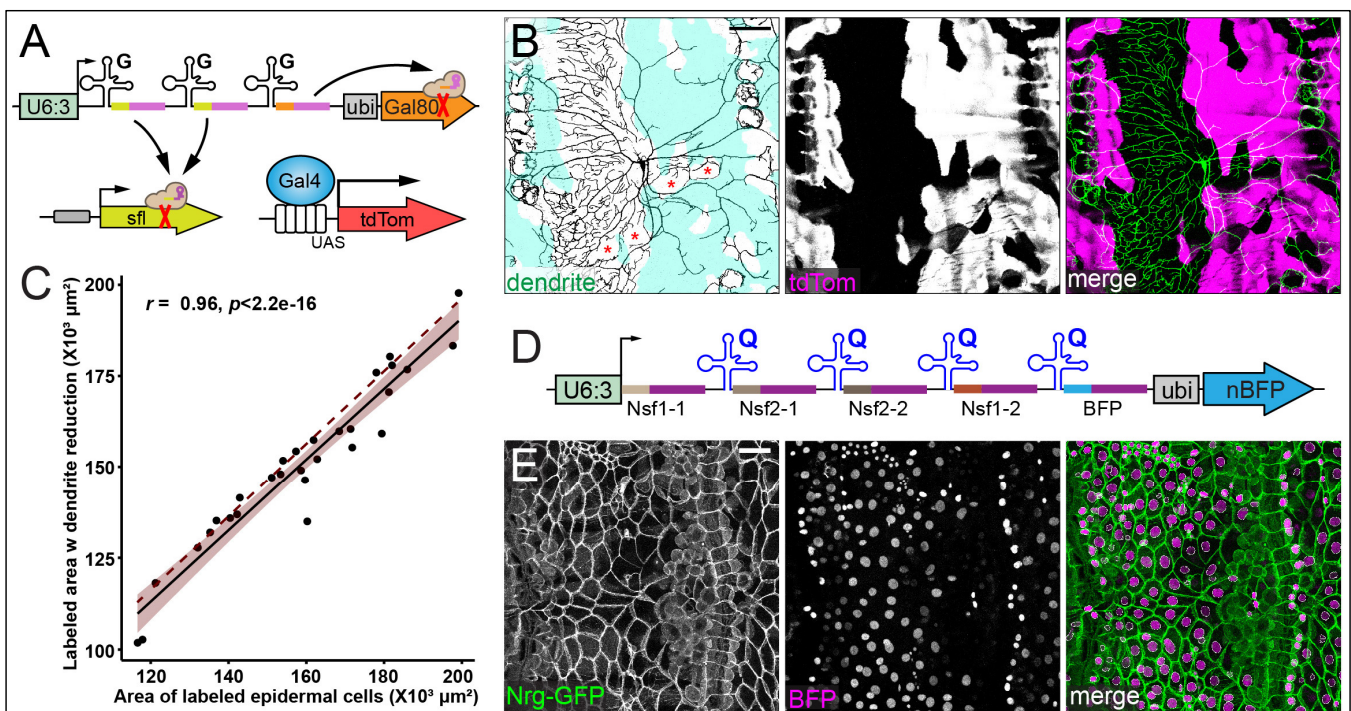

**Figure 3: Co-CRISPR enables positive and negative labeling of mutant cells in dendrite development and epithelial morphogenesis.**

(A) Design of positive-labeling of *sfl* mutant cells using co-CRISPR mutagenesis of a ubiquitous Gal80 co-CRISPR reporter (*gRNA-sfl(8R)*). The labeling of Gal80-mutant cells is enabled by Gal4-driven *UAS-tdTom* expression.

(B) Dendrite morphology and tdTom expression in a larva expressing *ppk-CD4-tdGFP* (green), *A58>tdTom* (magenta), *gRNA-sfl(8R)*, and *hh-Cas9*. tdTom-labeled areas are shaded in the dendrite panel. Red asterisks indicate muscle attachment cells, which C4da neurons do not innervate. Scale Bar, 100  $\mu\text{m}$ .

(C) Correlation between tdTom-labeled areas showing dendrite reduction and all tdTom-labeled areas. The solid line shows the linear regression, the shaded area is 95% confidence interval. The dotted line indicates a perfect correction (slope = 1). Pearson's Correlation Coefficient  $r = 0.96$ ,  $p < 2.2 \times 10^{-16}$ . Each dot represents a segment;  $n = 29$ , biological replicates = 15.

(D) Design of negative labeling of *Nsf1/Nsf2* double mutant cells by a nBFP co-CRISPR reporter (*gRNA-NSF1-NSF2[QQQ(2.1)-BR]*).

(E) A representative image of epidermal cell morphology in larvae expressing *gRNA-NSF1-NSF2[QQQ(2.1)-BR]*, *hh-Cas9*, and *Nrg-GFP* (Green). Scale Bar, 100  $\mu\text{m}$ .  $n$  = number of segments = 5, biological replicates = 3.

213 patches. The reliability of positive labeling of *sfl* mutant cells is demonstrated by a tight correlation  
214 (Pearson's correlation coefficient  $r = 0.96$ ) between labeled areas with dendrite reduction and all labeled  
215 areas (Figure 3C). Overall,  $95\% \pm 4\%$  ( $n=29$ ) labeled areas showed strong dendrite reduction,  
216 demonstrating that positive labeling by co-CRISPR is an effective approach for visualizing mutant  
217 epidermal cells.

218 We next further validated the effectiveness of negative labeling with the nBFP reporter by  
219 targeting *Nsfl/Nsf2* (Figure 3D). Epidermal cells lacking both *Nsfl* and *Nsf2* delaminate from the  
220 epidermal sheet and become round (13). Because this phenotype requires successful KO of all four  
221 alleles in the cell, reliable labeling of double mutant cells is expected to be more challenging. To  
222 increase the mutagenic efficiency, we used the Qtg2.1 design in this construct, as opposed to the tgFE  
223 design in *EGFP/GFP* and *sfl* co-CRISPR reporter constructs. When paired with *hh-Cas9*, this construct  
224 generated many BFP-negative cells in the posterior epidermal hemi-segment, all of which showed  
225 deformed morphology such as delamination and round shape (Figure 3E).

226 Together, our results suggest that both positive- and negative-labeling co-CRISPR constructs  
227 reliably report mutagenic events in the larval epidermis when paired with a proper Cas9.

## 228 **gRNA mutagenic efficiency is governed by different rules in the germline and the soma of** 229 ***Drosophila***

230 As the tgFE design has a superior mutagenic efficiency in somatic tissues than multi-gRNAs driven by  
231 separate Pol III promoters (13), we wondered if this principle is also true in the *Drosophila* germline.  
232 Therefore, we compared multiple versions of gRNA constructs to knock out three genes known to play  
233 important roles in germline development and/or early embryogenesis of the progeny. *bam* is required for  
234 germline development in both males and females and its loss blocks oogenesis in females and  
235 suppresses spermatogenesis in males (15, 30). *cid* is required for centromere identity in meiosis (31) and  
236 its LOF reduces male fertility (15). The third gene, *gnu*, is maternally required for early embryogenesis  
237 (32); thus, eggs derived from the germline of *gnu* mutant females show reduced hatchability (33). For  
238 each gene, we designed two constructs based on the tgFE design, with one containing a potent Pol III  
239 promoter CR7T (15) and the other containing the U63 promoter (#1 and #2 in Figure 4A, respectively).  
240 As a comparison, for each gene, we also generated a dual-gRNA construct driven by separate CR7T and  
241 U6:3 promoters (CR7T-U63(FE), #3 in Figure 4A).

242 We carried out KO experiments using a germline-specific Cas9, *nos-Cas9* (6), and measured  
243 "male fertility", which is the percentage of hatched eggs from individual wildtype females mated with



244 the KO males, “female egg number”, which is the number of eggs laid by individual KO females, and  
 245 “female fertility”, which is the percentage of hatched eggs from individual KO females mated with  
 246 wildtype males. We only measured female egg number and female fertility for the *gnu* KO, as *gnu* does  
 247 not play a role in the male germline. All three constructs for *bam* yielded strong reduction of male  
 248 fertility and female egg number, but surprisingly, with CR7T-U63(FE) showing the highest percentage  
 249 of complete loss of fertility in both males and females (100% and 90%, respectively) (Figures 4B and  
 250 4C). This suggests that the efficiency of *bam* gRNAs are high and not limited by the construct design.  
 251 For *cid*, we found that the CR7T-U63(FE) design was also much more efficient than tgFE designs in

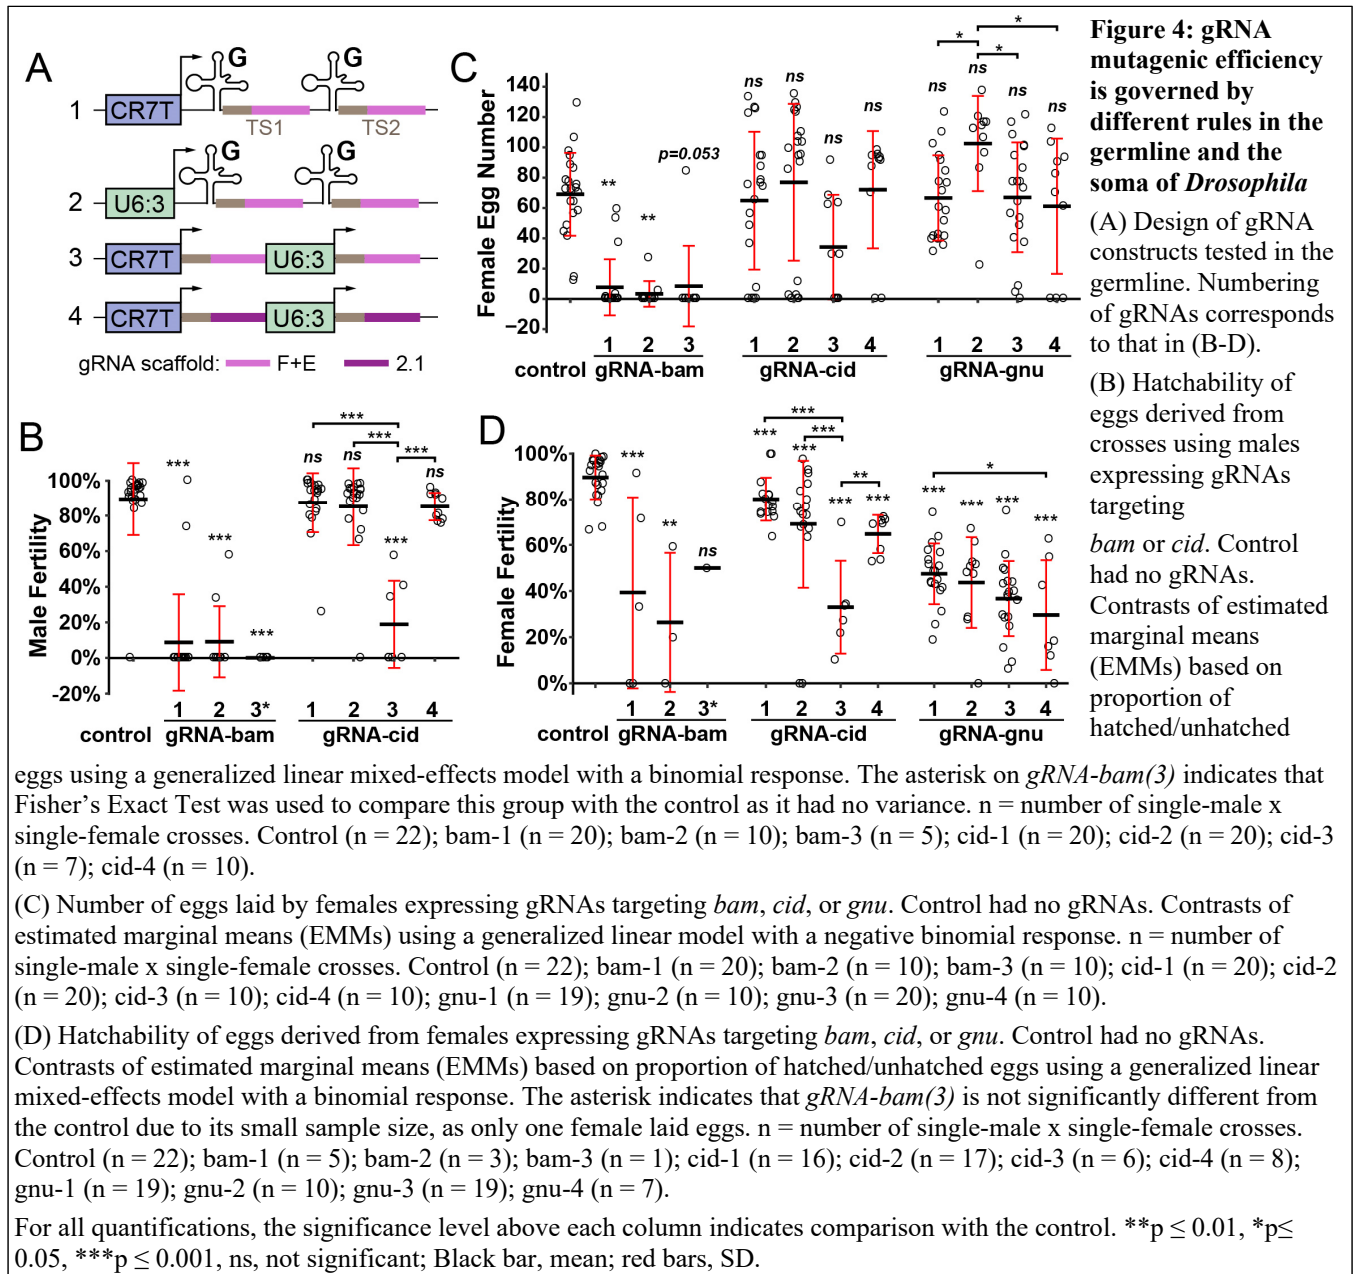

252 reducing male fertility and female fertility (Figures 4B and 4D): While CR7T-U63(FE) reduced 79% of  
253 male fertility and 63% of female fertility, the tgFE constructs did not affect male fertility and reduced  
254 11%-23% of female fertility. For *gnu*, although differences among the three constructs were not  
255 statistically significant for female fertility, the CR7T-U63(FE) version again appeared to be the most  
256 efficient (Figure 4D). These data indicate that including tRNAs in the gRNA construct negatively  
257 impacts mutagenic efficiency in the germline.

258 We then wondered whether gRNA2.1 can enhance gRNA mutagenic efficiency in the germline.  
259 Since the *bam* gRNAs were already very efficient, we made another dual-promoter-dual-gRNA  
260 construct using the gRNA2.1 scaffold (CR7T-U63(2.1), #4 in Figure 4A) for *cid* and *gnu* only. While  
261 this version appeared to increase the efficiency for *gnu* slightly (Figure 4D), it is significantly worse  
262 than CR7T-U63(FE) for *cid* (Figures 4B and 4D). Although this inconsistency could be specific to the  
263 target sequences used in our constructs due to RNA secondary structures, our data nevertheless suggest  
264 that CR7T-U63(FE) is the most reliable gRNA design for germline mutagenesis. Importantly, our results  
265 show that efficient mutagenesis requires different gRNA design principles in the germline and the soma,  
266 likely due to differences in RNA processing.

### 267 **Gal4-to-Cas9 conversion expands the options for tissue-specific Cas9**

268 Our CRISPR-TRiM strategy relies on tissue-specific Cas9 lines, the limited availability of which is  
269 currently the bottleneck for wide applications of CRISPR-TRiM. Meanwhile, a large number of tissue-  
270 specific Gal4 lines are available for virtually every tissue and all developmental stages of *Drosophila*.  
271 To take advantage of the Gal4 resources and eliminate the need for cloning and transgenesis for making  
272 new tissue-specific Cas9 lines, we developed a fast and reliable way to convert existing Gal4 lines into  
273 Cas9 lines through a few simple genetic crosses (Figure S2), based on homology assisted CRISPR  
274 knock-in (HACK) (34). This conversion utilizes a Cas9-donor transgenic construct that carries a 2A-  
275 Cas9 coding sequence flanked by Gal4 homology arms, a CR7T-U63(2.1) dual-gRNA cassette targeting  
276 the Gal4 coding sequence, and a ubiquitous nBFP marker for separating the Cas9-donor insertion from  
277 the converted Cas9 (Figure 5A). When combined with *nos-Cas9* and the Gal4 line of interest, the  
278 gRNAs generate DNA double-strand breaks in the middle of the Gal4 coding sequence and allow in-  
279 frame incorporation of 2A-Cas9 via homology-directed repair. The “self-cleaving” 2A peptide will  
280 release Cas9 and a truncated and nonfunctional Gal4 as two separate proteins after translation. The  
281 converted Cas9 chromosome can be detected by a positive Cas9 tester that we previously reported (13)  
282 (Figure S2).

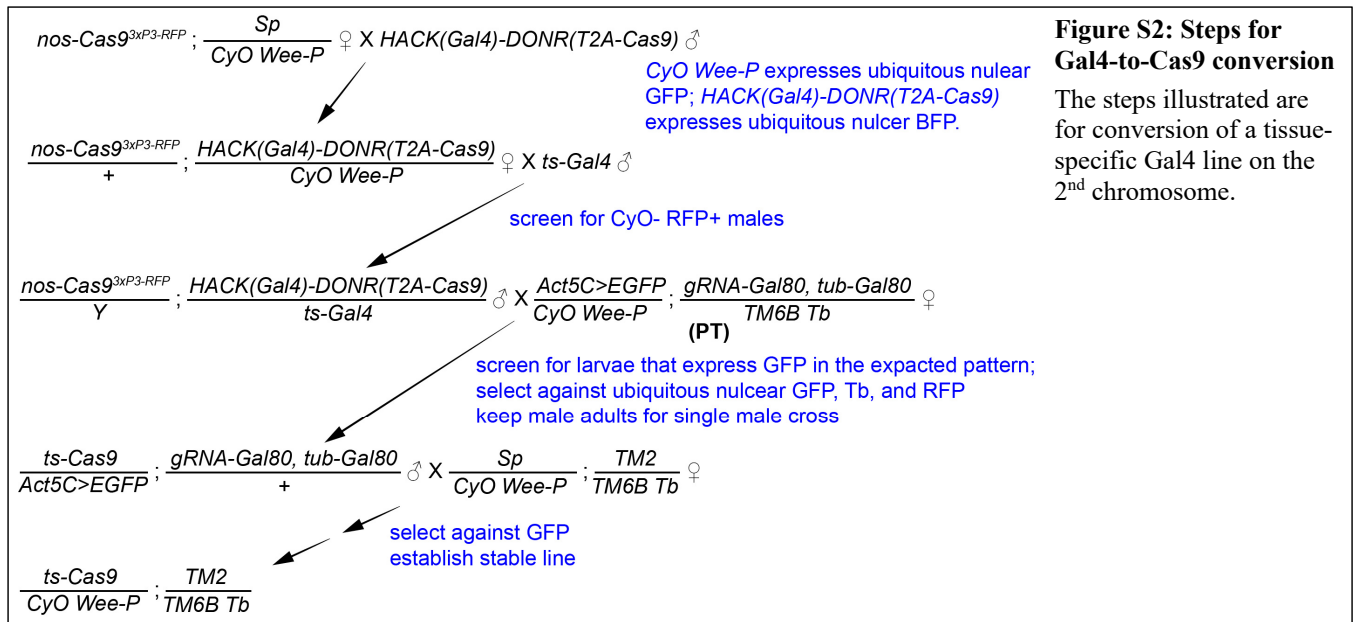

283 As a proof of principle, we converted three Gal4 lines that are specific to different tissues into  
 284 Cas9 lines. We compared activity patterns of the Cas9 lines, as revealed by the Cas9 positive-tester  
 285 *Act5C-Gal4 UAS-GFP; tub-Gal80 gRNA-gRNA* (13), to those of the original Gal4 lines. Interestingly,  
 286 Cas9s and the corresponding Gal4s do not always show identical activity patterns. *OK371-Gal4* is  
 287 specific to glutamatergic motor neurons in the third instar ventral nerve cord (VNC) (Figure 5B) (35),  
 288 while *OK371-Cas9* activity was detected in only a subset of these motor neurons, as well as in sporadic  
 289 glial cells in the brain lobes (Figure 5C). *esg-Gal4* is active in stem cell populations including larval  
 290 histoblasts (Figure 5D) (36), but we detected a much broader activity pattern of *esg-Cas9* in the larval  
 291 epidermis (Figure 5E). Lastly, while *HmlΔ-Gal4* is specific to larval hemocytes (Figure 5F) (37), the  
 292 activity of *HmlΔ-Cas9* was detected in hemocytes and also a small number of random epidermal cells  
 293 (Figure 5G). The discrepancies between Gal4 and Cas9 activity patterns are likely due to two factors.  
 294 First, whereas Gal4 reporters only reflect the current Gal4 activity, the Cas9 positive tester reports  
 295 accumulated Cas9 activity in the entire cell lineage during development, which could lead to broader  
 296 Cas9 patterns. Second, labeling of Cas9 activity by the positive tester relies on complete elimination of  
 297 Gal80 protein and therefore is subject to *Gal80* perdurance, which could result in more restricted  
 298 labeling than the true Cas9 pattern. Despite these differences, our method of Gal4-to-Cas9 conversion  
 299 simplifies the generation of new tissue-specific Cas9 lines and opens up broader opportunities for using  
 300 CRISPR-TRiM to study gene function.

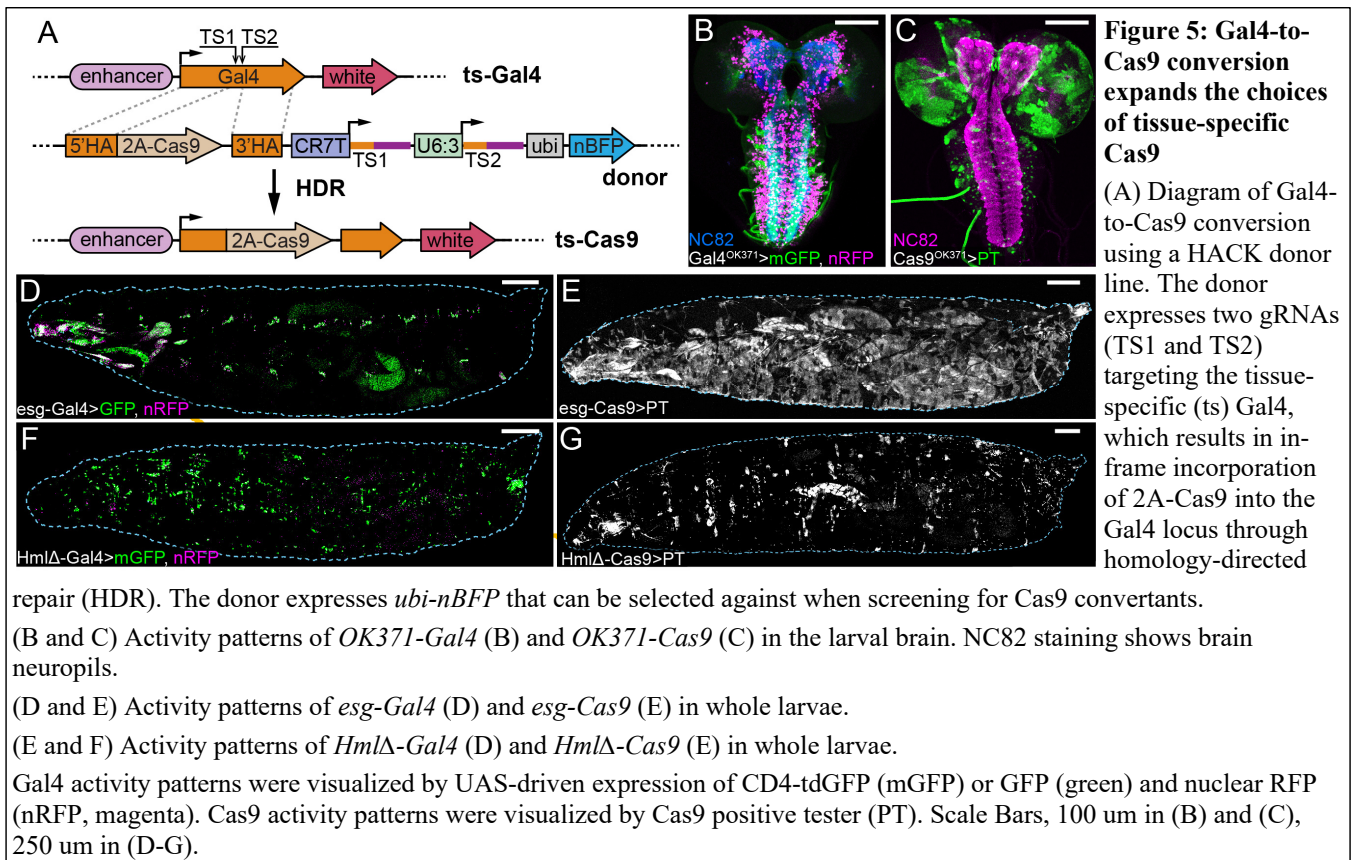

## 301 **DISCUSSION**

302 CRISPR/Cas9-mediated mutagenesis holds great promise in advancing genetic analysis in  
 303 *Drosophila* and is currently undergoing rapid development (38-40). However, existing tools for tissue-  
 304 specific mutagenesis can still be improved to increase their power for discovery and functional analysis  
 305 of genes. First, essential to the reliability of LOF analysis, gRNA efficiency can be further improved for  
 306 both somatic and germline mutagenesis. Second, methods for labeling mutant cells within the tissue of  
 307 interest are still missing. Lastly, although Gal4/UAS-Cas9 can be adopted for tissue-specific  
 308 mutagenesis, convenient ways of applying CRISPR/Cas9 independent of Gal4/UAS are needed to  
 309 maximize the simplicity, flexibility, and effectiveness of the system. In this study, we present solutions  
 310 to these deficiencies. The new tools we developed will likely be useful for *Drosophila* researchers to  
 311 address broad biological questions and can be adapted to improve CRISPR/Cas9 approaches in other  
 312 systems.

313 The success of tissue-specific mutagenesis depends vitally on gRNA efficiency. Although many  
 314 algorithms have been developed to predict gRNA efficiency based on the target sequence (41),  
 315 optimized gRNA expression vectors are still needed for achieving the maximal gRNA efficiency. The



316 design of the gRNA expression vector can affect the rate of gRNA production and gRNA-Cas9 complex  
317 formation. We previously found that the tgFE design that incorporates tRNA<sup>Gly</sup> spacers and the (F+E)  
318 gRNA scaffold for making multiplexed gRNAs was more efficient than other designs in knocking out  
319 genes in neurons (13). Now we show that the combination of tRNA<sup>Gln</sup> and the gRNA2.1 scaffold (the  
320 Qtg2.1 design) further improves gRNA efficiency in broad somatic tissues. This increase of gRNA  
321 efficiency is especially important for knocking out genes in polyploid tissues like muscles and glia or  
322 when more gRNAs are expressed simultaneously. It will also likely facilitate unmasking LOF  
323 phenotypes of genes expressed early in the cell lineage.

324 Surprisingly, we found that including tRNAs in multi-gRNA constructs is detrimental for  
325 germline mutagenesis. This unexpected result may reflect differences of tRNA processing mechanisms  
326 in somatic and germline tissues. In addition, although gRNA2.1 worked well in somatic tissues, our data  
327 suggest that it is comparable or worse than (F+E) in the germline. Therefore, our results demonstrate  
328 that mutagenesis in the soma and the germline requires different optimizations of the gRNA expression  
329 vector. For maximal efficiency, we recommend dual-gRNAs based on the Qtg2.1 design for somatic  
330 mutagenesis while we prefer dual-gRNAs with the (F+E) scaffold driven by separate promoters for  
331 germline mutagenesis.

332 To solve the challenge of labeling mutant cells in tissue-specific mutagenesis, we incorporated  
333 co-CRISPR systems in gRNA vectors to report Cas9 activity in the tissue of interest both positively and  
334 negatively. Due to the nature of CRISPR/Cas9-mediated mutagenesis, mutations in the targeted cells are  
335 inherently heterogeneous. Therefore, a reporting system that can truly reflect the nature of mutations in  
336 every cell is unlikely to be feasible. However, we show that a practical approach is to correlate the loss  
337 of the target gene with that of a co-CRISPR reporter. Because this approach requires reliable  
338 mutagenesis of both the GOI and the reporter, its success depends on both the Cas9 and the gRNAs for  
339 the GOI. First, Cas9 needs to be expressed evenly and at a relatively high level in the intended tissue so  
340 that both the GOI and the reporter have ample opportunities to be mutated. For example, the high and  
341 persistent expression of *hh-Cas9* in the posterior wing disc results in reliable labeling of mutant cells,  
342 while its low and transient leaky expression in the anterior wing disc cannot be faithfully reported.  
343 Second, as gRNAs for co-CRISPR reporters are already chosen to be highly efficient, gRNAs for the  
344 GOI also need to be adequately efficient to minimize false-positive reporting. In practice, both Cas9s  
345 and gRNA transgenes needed to be validated before use in labeled mutagenesis, such as by using our  
346 EGFP-BFP reporter line and the Cas9-LEThAL assay (13), respectively. It is important to note that it is

347 not appropriate to predict the quantitative degree of GOI LOF by measuring expression levels of co-  
348 CRISPR reporters, as incomplete removal of co-CRISPR reporters indicates weak or late Cas9 activity  
349 and hence poor correlation between mutagenesis of GOI and the reporters. Therefore, phenotypic  
350 analysis should be conducted only in cells that show robust co-CRISPR labeling.

351 To overcome the limited availability of tissue-specific Cas9 lines, we adopted the HACK  
352 approach (34) and developed reagents for convenient conversion of existing Gal4 lines into Cas9 lines.  
353 This easy conversion involves no cloning or transformation steps. This method adds to the existing  
354 options of enhancer-driven Cas9 lines (13) and puts CRISPR-TRiM analysis within reach of the broader  
355 *Drosophila* community. As a proof of principle, we generated three tissue-specific Cas9s. Interestingly,  
356 converted Cas9s and the original Gal4s do not always show identical activity patterns, likely due to the  
357 difference in the ways their activities are visualized. It is worth noting that the option of Gal4-driven  
358 Cas9 may not alleviate this discrepancy because Gal4-driven Cas9 could also have leaky expression (39)  
359 and mutagenesis by Gal4-driven Cas9 suffers even more from perdurance (13). Nevertheless, our results  
360 suggest that it is important to validate the activity patterns of converted Cas9s before using them in  
361 tissue-specific mutagenesis.

362 Excitingly, large-scale transgenic gRNA libraries are currently in production and being made  
363 available to the *Drosophila* community (12, 39, 40). However, the mutagenic efficiencies of existing  
364 gRNAs vary significantly (39, 40). While progress has been made to improve gRNA efficiency in  
365 *Drosophila* and mammalian systems (13, 21), many optimizations have not been incorporated into these  
366 libraries. With the new designs we present here, future libraries could be developed to fit specific  
367 screening needs, for example, in the germline, in somatic tissues, or for marked mutagenic analysis.

368

## 369 **MATERIALS AND METHODS**

### 370 **Table S1. Key Resource Table**

| REAGENT or RESOURCE                           | SOURCE | IDENTIFIER      | ADDITIONAL INFORMATION             |
|-----------------------------------------------|--------|-----------------|------------------------------------|
| <b>Experimental Models: Organisms/Strains</b> |        |                 |                                    |
| <i>ppk-Gal4</i>                               | (42)   |                 | <i>ppk-Gal4<sup>VK00037</sup></i>  |
| <i>UAS-CD4-tdTom</i>                          | (43)   | RRID:BDSC_35841 | <i>UAS-CD4-tdTom<sup>7M1</sup></i> |

|                        |                                           |                 |                                        |
|------------------------|-------------------------------------------|-----------------|----------------------------------------|
| <i>ppk-CD4-tdGFP</i>   | (43)                                      | RRID:BDSC_35842 | <i>ppk-CD4-tdGFP<sup>1b</sup></i>      |
| <i>A58-Gal4</i>        | (44)                                      |                 | <i>GawB<sup>A58</sup></i>              |
| <i>UAS-CD4-tdGFP</i>   | (43)                                      | RRID:BDSC_35836 | <i>UAS-CD4-tdGFP<sup>VK00033</sup></i> |
| <i>ubiquitous EGFP</i> | Bloomington<br>Drosophila Stock<br>Center | RRID:BDSC_77138 | <i>P{Wee-P.ph0}Bacc[Wee-P20]</i>       |
| <i>UAS-2xEGFP</i>      | Bloomington<br>Drosophila Stock<br>Center | RRID:BDSC_6658  | <i>UAS-2xEGFP<sup>AH3</sup></i>        |
| <i>UAS-nRFP</i>        | Bloomington<br>Drosophila Stock<br>Center | RRID:BDSC_8547  | <i>UAS-RedStinger<sup>6</sup></i>      |
| <i>Nrg-GFP</i>         | Bloomington<br>Drosophila Stock<br>Center | RRID:BDSC_6844  | <i>Nrg-GFP<sup>G00305</sup></i>        |
| <i>hmlΔ-Gal4</i>       | Bloomington<br>Drosophila Stock<br>Center | RRID:BDSC_30139 | <i>hmlΔ-Gal4<sup>2</sup></i>           |
| <i>OK371-Gal4</i>      | Bloomington<br>Drosophila Stock<br>Center | RRID:BDSC_26160 | <i>GawB<sup>VGlut[OK371]</sup></i>     |
| <i>esg-Gal4</i>        | KYOTO Stock Center<br>(DGRC)              | DGRC 104863     | <i>GawB<sup>NP5130</sup></i>           |
| <i>Act5C-Cas9</i>      | Bloomington<br>Drosophila Stock<br>Center | RRID:BDSC_54590 | <i>Act5C-Cas9.P</i>                    |
| <i>hh-Cas9</i>         | (13)                                      | RRID:BDSC_81929 | <i>R28E04-Cas9<sup>6A</sup></i>        |



|                            |                                           |                     |                                                                                                    |
|----------------------------|-------------------------------------------|---------------------|----------------------------------------------------------------------------------------------------|
| <i>zk-Cas9</i>             | Han lab, unpublished                      |                     | <i>zk-Cas9<sup>VK00037</sup></i>                                                                   |
| <i>nos-Cas9</i>            | Bloomington<br>Drosophila Stock<br>Center | RRID:BDSC_<br>54591 | <i>nos-Cas9.P<sup>ZH-2A</sup></i>                                                                  |
| <i>ppk-Cas9</i>            | (13)                                      |                     | <i>ppk-Cas9<sup>1B</sup></i>                                                                       |
| <i>Cas9-PT</i>             | (13)                                      | RRID:BDSC_<br>81889 | <i>Act5C-GAL4-w<sup>E1</sup>, UAS-EGFP;<br/>tubP-GAL80<sup>LL9</sup> gRNA-Gal80<sup>VK27</sup></i> |
| <i>Oregon-R-P2</i>         | Bloomington<br>Drosophila Stock<br>Center | RRID:BDSC_<br>2376  |                                                                                                    |
| <i>gRNA-Syx5(GG)</i>       | This study                                |                     | <i>gRNA-Syx5(GG)<sup>VK00027</sup></i>                                                             |
| <i>gRNA-BFP-Syx5(GQ)</i>   | This study                                |                     | <i>gRNA-BFP-Syx5(GQ)<sup>VK00027</sup></i>                                                         |
| <i>gRNA-BFP-Syx5(GS)</i>   | This study                                |                     | <i>gRNA-BFP-Syx5(GS)<sup>VK00027</sup></i>                                                         |
| <i>gRNA-BFP-Syx5(GL)</i>   | This study                                |                     | <i>gRNA-BFP-Syx5(GL)<sup>VK00027</sup></i>                                                         |
| <i>gRNA-BFP-Syx5(GN)</i>   | This study                                |                     | <i>gRNA-BFP-Syx5(GN)<sup>VK00027</sup></i>                                                         |
| <i>gRNA-BFP-Syx5(GV)</i>   | This study                                |                     | <i>gRNA-BFP-Syx5(GV)<sup>VK00027</sup></i>                                                         |
| <i>gRNA-BFP-Syx5(GK)</i>   | This study                                |                     | <i>gRNA-BFP-Syx5(GK)<sup>VK00027</sup></i>                                                         |
| <i>gRNA-GFP[ACDG]</i>      | (13)                                      | RRID:BDSC_<br>81894 | <i>gRNA-GFP[ACDG]<sup>VK00027</sup></i>                                                            |
| <i>gRNA-GFP[ACMG(FE)]</i>  | (13)                                      | RRID:BDSC_<br>81897 | <i>gRNA-GFP[ACMG(FE)]<sup>VK00027</sup></i>                                                        |
| <i>gRNA-GFP[ACMG(2.1)]</i> | This study                                |                     | <i>gRNA-GFP[ACMG(2.1)]<sup>VK00027</sup></i>                                                       |

|                                    |            |                 |                                                      |
|------------------------------------|------------|-----------------|------------------------------------------------------|
| <i>gRNA-GFP[ACMG(FE)-BR]</i>       | This study |                 | <i>gRNA-GFP[ACMG(FE)-BR]<sup>VK00027</sup></i>       |
| <i>gRNA-GFP[ACMG(2.1)-8R]</i>      | This study |                 | <i>gRNA-GFP[ACMG(2.1)-8R]<sup>VK00027</sup></i>      |
| <i>gRNA-GFP[ACMG(2.1)-BFP]</i>     | This study |                 | <i>gRNA-GFP[ACMG(2.1)-BFP]<sup>VK00027</sup></i>     |
| <i>gRNA-NSF1-NSF2[GGGG(FE)]</i>    | (13)       | RRID:BDSC_81909 | <i>gRNA-NSF1-NSF2[GGGG(FE)]<sup>VK00027</sup></i>    |
| <i>gRNA-NSF1-NSF2[GVSQ(FE)]</i>    | This study |                 | <i>gRNA-NSF1-NSF2[GVSQ(FE)]<sup>VK00027</sup></i>    |
| <i>gRNA-NSF1-NSF2[GQGQ(FE)]</i>    | This study |                 | <i>gRNA-NSF1-NSF2[GQGQ(FE)]<sup>VK00027</sup></i>    |
| <i>gRNA-NSF1-NSF2[GNKQ(FE)]</i>    | This study |                 | <i>gRNA-NSF1-NSF2[GNKQ(FE)]<sup>VK00027</sup></i>    |
| <i>gRNA-NSF1-NSF2[GQQQ(FE)]</i>    | This study |                 | <i>gRNA-NSF1-NSF2[GQQQ(FE)]<sup>VK00027</sup></i>    |
| <i>gRNA-NSF1-NSF2[QQQ(2.1)]</i>    | This study |                 | <i>gRNA-NSF1-NSF2[QQQ(2.1)]<sup>VK00027</sup></i>    |
| <i>gRNA-NSF1-NSF2[QQQ(2.1)-BR]</i> | This study |                 | <i>gRNA-NSF1-NSF2[QQQ(2.1)-BR]<sup>VK00027</sup></i> |
| <i>gRNA-NSF1-NSF2[QQQ(2.1)-8R]</i> | This study |                 | <i>gRNA-NSF1-NSF2[QQQ(2.1)-8R]<sup>VK00027</sup></i> |
| <i>gRNA-sfl(8R)</i>                | This study |                 | <i>gRNA-sfl(8R)<sup>VK00027</sup></i>                |
| <i>UAS-tdTom</i>                   | This study |                 | <i>UAS-tdTom<sup>VK00033</sup></i>                   |
| <i>gRNA-bam(1)</i>                 | This study |                 | <i>gRNA-bam(1)<sup>VK00027</sup></i>                 |
| <i>gRNA-cid(1)</i>                 | This study |                 | <i>gRNA-cid(1)<sup>VK00027</sup></i>                 |

|                                        |                                      |                       |                                                   |
|----------------------------------------|--------------------------------------|-----------------------|---------------------------------------------------|
| <i>gRNA-gnu(1)</i>                     | This study                           |                       | <i>gRNA-gnu(1)<sup>VK00027</sup></i>              |
| <i>gRNA-bam(2)</i>                     | This study                           |                       | <i>gRNA-bam(2)<sup>VK00027</sup></i>              |
| <i>gRNA-cid(2)</i>                     | This study                           |                       | <i>gRNA-cid(2)<sup>VK00027</sup></i>              |
| <i>gRNA-gnu(2)</i>                     | This study                           |                       | <i>gRNA-gnu(2)<sup>VK00027</sup></i>              |
| <i>gRNA-bam(3)</i>                     | This study                           |                       | <i>gRNA-bam(3)<sup>VK00027</sup></i>              |
| <i>gRNA-cid(3)</i>                     | This study                           |                       | <i>gRNA-cid(3)<sup>VK00027</sup></i>              |
| <i>gRNA-gnu(3)</i>                     | This study                           |                       | <i>gRNA-gnu(3)<sup>VK00027</sup></i>              |
| <i>gRNA-cid(4)</i>                     | This study                           |                       | <i>gRNA-cid(4)<sup>VK00027</sup></i>              |
| <i>gRNA-gnu(4)</i>                     | This study                           |                       | <i>gRNA-gnu(4)<sup>VK00027</sup></i>              |
| <i>HACK(Gal4)-DONR(T2A-Cas9)</i>       | This study                           |                       | <i>HACK(Gal4)-DONR(T2A-Cas9)<sup>attP40</sup></i> |
| <b>Antibody</b>                        |                                      |                       |                                                   |
| NC82                                   | Developmental Studies Hybridoma Bank | RRID:AB_2314866       | 1:100 dilution                                    |
| Cy5 Donkey Anti-Mouse IgG (H+L)        | Jackson ImmunoResearch Laboratories  | RRID:AB_2340819       | 1:400 dilution                                    |
| Alexa Fluor 488 Rabbit anti-GFP        | Thermo Fisher Scientific,            | Catalog # A-21311     | 1:500 dilution                                    |
| <b>Recombinant DNA</b>                 |                                      |                       |                                                   |
| pAC-U63-tgRNA-Rev                      | (13)                                 | RRID:Addgene_e_112811 |                                                   |
| <i>Ubi-CasExpress<sup>attP40</sup></i> | Bloomington Drosophila Stock Center  | RRID:BDSC_65419       | Genomic DNA used as a PCR template                |
| pBPGAL80Uw-4                           | Addgene                              | RRID:Addgene_26235    |                                                   |

|                                               |                                                                     |                            |  |
|-----------------------------------------------|---------------------------------------------------------------------|----------------------------|--|
| pUA                                           | (44)                                                                | RRID:<br>Addgene_5837<br>2 |  |
| pDEST-HemmarR2                                | (13)                                                                | RRID:Addgen<br>e_112813    |  |
| <b>Software and Algorithms</b>                |                                                                     |                            |  |
| Fiji                                          | <a href="https://fiji.sc/">https://fiji.sc/</a>                     | RRID:<br>SCR_002285        |  |
| R                                             | <a href="https://www.r-project.org/">https://www.r-project.org/</a> | RRID:<br>SCR_001905        |  |
| Adobe Photoshop                               | Adobe                                                               | RRID:SCR_01<br>4199        |  |
| Adobe Illustrator                             | Adobe                                                               | RRID:SCR_01<br>0279        |  |
| <b>Other</b>                                  |                                                                     |                            |  |
| NEBuilder® HiFi<br>DNA Assembly<br>Master Mix | New England Biolabs<br>Inc.                                         | #E2621                     |  |
| SlowFade Diamond<br>Antifade Mountant         | Thermo Fisher<br>Scientific                                         | Catalog #<br>S36967        |  |

371

## 372 Fly Stocks

373 See Table S1 (Key Resource Table) for details of fly stocks used in this study. All flies were cultured on  
374 standard yeast-glucose medium in a 12:12 light/dark cycle at 25°C. We use *ppk-CD4-tdGFP* and  
375 *ppk>CD4-tdTom* to visualize C4da neurons; *CyO*, *Wee-P20* balancer as ubiquitous nuclear EGFP; *Nrg-*  
376 *GFP* to visualize epidermal cell shape; *UAS-CD4-tdGFP*, *UAS-RedStinger*, and *UAS-EGFP* to visualize  
377 Gal4 activity; and Cas9 positive tester (PT) to visualize Cas9 activity.

## 378 Molecular Cloning

379 *gRNA cloning vectors*: Nine gRNA cloning vectors listed in Table S2 were constructed in the pAC  
380 (attB-CaSpeR4) backbone (13). Each of them contains in order some or all of the following components

381 as specified in Table S2: a Pol III promoter, a tRNA, SapI cloning sites, a gRNA scaffold, a gRNA  
 382 targeting the co-CRISPR reporter, U6 3' flanking sequence, and a ubiquitous co-CRISPR reporter. The  
 383 U6:3 promoter was PCR amplified from pAC-U63-tgRNA-Rev (Addgene #112811). The CR7T  
 384 promoter was synthesized as a gBlock DNA fragment (IDT, Inc.). tRNAs and gRNA scaffolds were  
 385 synthesized as gBlock DNA fragments. The promoter of *Ubi-p63E* was PCR amplified from *Ubi-*  
 386 *CasExpress* genomic DNA (45). mTagBFP-NLS was synthesized as a gBlock DNA fragment. Gal80  
 387 coding sequence was PCR amplified from pBPGAL80Uw-4 (Addgene 26235). A *His2Av* polyA  
 388 sequence after the BFP/Gal80 coding sequence was PCR amplified from pDEST-HemmarR2 (Addgene  
 389 # 112813).

390 **Table S2. gRNA cloning vectors**

| <b>gRNA cloning vector</b> | <b>Pol III promoter</b> | <b>tRNA</b>         | <b>gRNA scaffold</b> | <b>co-CRISPR gRNA</b> | <b>reporter</b> |
|----------------------------|-------------------------|---------------------|----------------------|-----------------------|-----------------|
| pAC-U63-gRNA2.1            | U6:3                    | -                   | gRNA2.1              | -                     | -               |
| pAC-U63-tgRNA-BR           | U6:3                    | tRNA <sup>Gly</sup> | (F+E)                | BFP                   | ubi-nlsBFP      |
| pAC-U63-tgRNA-8R           | U6:3                    | tRNA <sup>Gly</sup> | (F+E)                | Gal80                 | ubi-Gal80       |
| pAC-U63-QtgRNA2.1-BR       | U6:3                    | tRNA <sup>Gln</sup> | gRNA2.1              | BFP                   | ubi-nlsBFP      |
| pAC-U63-QtgRNA2.1-8R       | U6:3                    | tRNA <sup>Gln</sup> | gRNA2.1              | Gal80                 | ubi-Gal80       |
| pAC-U63-gRNA2.1-BFP        | U6:3                    | tRNA <sup>Gln</sup> | gRNA2.1              | -                     | ubi-nlsBFP      |
| pAC-CR7T-tgRNA(Rev)        | CR7T                    | tRNA <sup>Gly</sup> | (F+E)                | -                     | -               |
| pAC-CR7T-gRNA-nlsBFP       | CR7T                    | -                   | (F+E)                | -                     | ubi-nlsBFP      |
| pAC-CR7T-gRNA2.1-nlsBFP    | CR7T                    | -                   | gRNA2.1              | -                     | ubi-nlsBFP      |

391 *gRNA PCR template vectors*: Eight PCR template vectors as listed in Table S3 were constructed for  
 392 generating PCR fragments used for assembling the final gRNA expression vectors. Each of them was  
 393 made by assembling a synthetic gBlock DNA fragment with a PCR-amplified Kanamycin resistant  
 394 backbone using NEBuilder DNA Assembly (New England Biolabs). The region to be PCR-amplified in  
 395 each vector contains a gRNA scaffold followed by either a tRNA or the U6:3 promoter. The sequences  
 396 of tRNAs are listed in Table S4.

397 **Table S3. gRNA PCR template vectors**

| PCR template vector | gRNA scaffold | tRNA/promoter       |
|---------------------|---------------|---------------------|
| pTR(EF)-tRNA(K)     | (F+E)         | tRNA <sup>Lys</sup> |
| pTR(EF)-tRNA(L)     | (F+E)         | tRNA <sup>Leu</sup> |
| pTR(EF)-tRNA(N)     | (F+E)         | tRNA <sup>Asn</sup> |
| pTR(EF)-tRNA(Q)     | (F+E)         | tRNA <sup>Gln</sup> |
| pTR(EF)-tRNA(S)     | (F+E)         | tRNA <sup>Ser</sup> |
| pTR(EF)-tRNA(V)     | (F+E)         | tRNA <sup>Val</sup> |
| pGC(EF)-U6.3        | (F+E)         | U6:3                |
| pGC(2.1)-U6.3       | gRNA2.1       | U6:3                |

398 **Table S4. tRNA sequences**

| tRNA    | sequence (lower case sequence is a short leader)                                                 |
|---------|--------------------------------------------------------------------------------------------------|
| Leu (L) | aaacaaaGTCAGGATGGCCGAGTGGTCTAAGGCGCTGCGTTCAGGTCGCAGTCTAC<br>TCTGTAGGCGTGGGTTCTGAATCCCACCTTCTGACA |
| Ser (S) | aaacaaaGACGAGGTGGCCGAGTGGTTAAGGCGTTGGACTGCTAATCCAATGTGCT<br>CTGCACGCGTGGGTTCTGAATCCCATCCTCGTCTG  |
| Val (V) | aaacaaaGTTTTTCGTAGTGTAGTGGTTATCACGTGTGCTTCACACGCACAAGGTCCC<br>CGGTTCTGAACCCGGGCGAAAACA           |
| Lys (K) | aaacaaaGCCCGGCTAGCTCAGTCGGTAGAGCATGAGACTCTTAATCTCAGGGTCTG<br>TGGGTTCTGAGCCCCACGTTGGGCG           |
| Gln (Q) | cagegcGGTTCATGGTGTAAATGGTTAGCACTCAGGACTCTGAATCCTGCGATCC<br>GAGTTCAAATCTCGGTGGAACCT               |

|        |                                                                                      |
|--------|--------------------------------------------------------------------------------------|
| Asn(N) | aacaaaGCCTCCGTGGCGCAATTGGTTAGCGCGTTCGGCTGTTAACCGAAAGGTT<br>GGTGGTTCGAGTCCACCCGGGGGCG |
|--------|--------------------------------------------------------------------------------------|

399 *gRNA expression vectors*: 30 gRNA expression vectors as listed in Table S5 were constructed with  
 400 appropriate gRNA cloning vectors and gRNA PCR template vectors. Primers were designed to contain  
 401 appropriate gRNA target sequences and sequences complementary to the PCR template vectors. The  
 402 PCR products were then assembled with SapI-digested gRNA cloning vectors using NEBuilder DNA  
 403 Assembly. Table S6 lists the gRNA target sequences used in this study. Table S7 provides a guideline  
 404 for designing primers and choosing PCR template vectors for making Qtg2.1 multi-gRNAs and reporter  
 405 gRNAs for somatic tissues and CR7T-U6:3 dual-gRNA constructs for the germline.

406 **Table S5. gRNA expression vectors**

| <b>gRNA expression vector</b> | <b>gRNA cloning vector</b> | <b>PCR template</b>  | <b>corresponding transgenic line</b> |
|-------------------------------|----------------------------|----------------------|--------------------------------------|
| pACMG2-Syx5                   | pAC-U63-tgRNA-Rev          | pMGC                 | gRNA-Syx5(GG)                        |
| pACMG(GQ)2-BFP-Syx5           | pAC-U63-tgRNA-Rev          | pTR(EF)-tRNA(Q)      | gRNA-BFP-Syx5(GQ)                    |
| pACMG(GS)2-BFP-Syx5           | pAC-U63-tgRNA-Rev          | pTR(EF)-tRNA(S)      | gRNA-BFP-Syx5(GS)                    |
| pACMG(GL)2-BFP-Syx5           | pAC-U63-tgRNA-Rev          | pTR(EF)-tRNA(L)      | gRNA-BFP-Syx5(GL)                    |
| pACMG(GN)2-BFP-Syx5           | pAC-U63-tgRNA-Rev          | pTR(EF)-tRNA(N)      | gRNA-BFP-Syx5(GN)                    |
| pACMG(GV)2-BFP-Syx5           | pAC-U63-tgRNA-Rev          | pTR(EF)-tRNA(V)      | gRNA-BFP-Syx5(GV)                    |
| pACMG(GK)2-BFP-Syx5           | pAC-U63-tgRNA-Rev          | pTR(EF)-tRNA(K)      | gRNA-BFP-Syx5(GK)                    |
| pACMG(2.1)2-GFP               | pAC-U63-gRNA2.1            | pAC-U63-QtgRNA2.1-BR | gRNA-GFP[ACMG(2.1)]                  |
| pACMG(BR)(FE)2-GFP            | pAC-U63-tgRNA-BR           | pMGC                 | gRNA-GFP[ACMG(FE)-BR]                |



|                         |                      |                                                         |                             |
|-------------------------|----------------------|---------------------------------------------------------|-----------------------------|
| pACMG8R(2.1)2-GFP       | pAC-U63-QtgRNA2.1-8R | pAC-U63-QtgRNA2.1-BR                                    | gRNA-GFP[ACMG(2.1)-8R]      |
| pACBMG(2.1)2-GFP        | pAC-U63-gRNA2.1-BFP  | pAC-U63-QtgRNA2.1-BR                                    | gRNA-GFP[ACMG(2.1)-BFP]     |
| pACMG(GVSQ)4-NSF1-NSF2  | pAC-U63-tgRNA-Rev    | pTR(EF)-tRNA(V);<br>pTR(EF)-tRNA(S);<br>pTR(EF)-tRNA(Q) | gRNA-NSF1-NSF2[GVSQ(FE)]    |
| pACMG(GQGQ)4-NSF1-NSF2  | pAC-U63-tgRNA-Rev    | pTR(EF)-tRNA(Q);<br>pMGC                                | gRNA-NSF1-NSF2[GQGQ(FE)]    |
| pACMG(GNKQ)4-NSF1-NSF2  | pAC-U63-tgRNA-Rev    | pTR(EF)-tRNA(N);<br>pTR(EF)-tRNA(K);<br>pTR(EF)-tRNA(Q) | gRNA-NSF1-NSF2[GNKQ(FE)]    |
| pACMG(GQQQ)4-NSF1-NSF2  | pAC-U63-tgRNA-Rev    | pTR(EF)-tRNA(Q)                                         | gRNA-NSF1-NSF2[GQQQ(FE)]    |
| pACMG(2.1)4-NSF1-NSF2   | pAC-U63-gRNA2.1      | pAC-U63-QtgRNA2.1-BR                                    | gRNA-NSF1-NSF2[QQQ(2.1)]    |
| pACMGBR(2.1)4-NSF1-NSF2 | pAC-U63-QtgRNA2.1-BR | pAC-U63-QtgRNA2.1-BR                                    | gRNA-NSF1-NSF2[QQQ(2.1)-BR] |
| pACMG8R(2.1)4-NSF1-NSF2 | pAC-U63-QtgRNA2.1-8R | pAC-U63-QtgRNA2.1-BR                                    | gRNA-NSF1-NSF2[QQQ(2.1)-8R] |
| pACMG8R(GQ)2-sfl        | pAC-U63-tgRNA-8R     | pTR(EF)-tRNA(Q)                                         | gRNA-sfl(8R)                |
| pACMGCR2-bam            | pAC-CR7T-tgRNA(Rev)  | pMGC                                                    | gRNA-bam(1)                 |
| pACMGCR2-cid            | pAC-CR7T-tgRNA(Rev)  | pMGC                                                    | gRNA-cid(1)                 |

|                |                                 |               |             |
|----------------|---------------------------------|---------------|-------------|
| pACMGCR3-gnu   | pAC-CR7T-<br>tgRNA(Rev)         | pMGC          | gRNA-gnu(1) |
| pACMG2-bam     | pAC-U63-<br>tgRNA-Rev           | pMGC          | gRNA-bam(2) |
| pACMG2-cid     | pAC-U63-<br>tgRNA-Rev           | pMGC          | gRNA-cid(2) |
| pACMG3-gnu     | pAC-U63-<br>tgRNA-Rev           | pMGC          | gRNA-gnu(2) |
| pACGC-bam      | pAC-CR7T-<br>gRNA-nlsBFP        | pGC(EF)-U6.3  | gRNA-bam(3) |
| pACGC-cid      | pAC-CR7T-<br>gRNA-nlsBFP        | pGC(EF)-U6.3  | gRNA-cid(3) |
| pACGC-gnu      | pAC-CR7T-<br>gRNA-nlsBFP        | pGC(EF)-U6.3  | gRNA-gnu(3) |
| pACGC(2.1)-cid | pAC-CR7T-<br>gRNA2.1-<br>nlsBFP | pGC(2.1)-U6.3 | gRNA-cid(4) |
| pACGC(2.1)-gnu | pAC-CR7T-<br>gRNA2.1-<br>nlsBFP | pGC(2.1)-U6.3 | gRNA-gnu(4) |

407 **Table S6. gRNA target sequences**

| gene  | target sequence 1        | target sequence 2        | target sequence 3 |
|-------|--------------------------|--------------------------|-------------------|
| Syx5* | CGACGACAAGTACGGC<br>AAGG | TCTCAGCGAGGAAAACC<br>AAG |                   |
| EGFP  | CAACTACAAGACCCGC<br>GCCG |                          |                   |
| GFP   | GGTTGTCTGGTAAAAGG<br>ACA |                          |                   |
| BFP   | GTGACCACCTACGAGG<br>ACGG |                          |                   |

|       |                          |                           |                          |
|-------|--------------------------|---------------------------|--------------------------|
| Nsf1  | AAAACGGTGGAGGTGC<br>CCAG | GATGCCATTTGCAAGCA<br>GCG  |                          |
| Nsf2  | GAATGTGTCCGATTTCA<br>CGG | CCGCATCCTCGGTAACAC<br>GG  |                          |
| sfl   | CTTGTACGTGACAATGC<br>CGG | GTACCTATGAGCCAGTG<br>GAG  |                          |
| bam   | GCAATGAAAACGAAGA<br>TCCG | GTTGCAAGCAATCCAAA<br>CCG  |                          |
| cid   | GGACGCCGGACGGAGG<br>CAGC | GGAAAGCAAAACGCGAG<br>CAGC |                          |
| gnu** | TTCGAATGTAAAAGCTT<br>CGG | TTCCTGCCAACGCCTCCA<br>GT  | AAAATTAGCAGAAATC<br>CTAC |
| Gal4  | GATGTGCAGCGTACCAC<br>AAC | TGTATTCTGAGAAAGCTG<br>GA  |                          |

408 \*The target sequence 2 of Syx5 was used to construct BFP-Syx5 dual-gRNA expression vectors.

409 \*\*All three target sequences are in gRNA-gnu(1) and gRNA-gnu(2), but only target sequence 1 & 2 are  
410 in gRNA-gnu(3) and gRNA-gnu(4).

411 **Table S7. Primer designs for cloning gRNA expression constructs**

| Primer pair                                                                                                       | Sequence                                                            | Note for (N) <sub>20</sub>  | PCR template         |
|-------------------------------------------------------------------------------------------------------------------|---------------------------------------------------------------------|-----------------------------|----------------------|
| <i>I. To make dual-gRNA constructs using pAC-U63-gRNA2.1, pAC-U63-QtgRNA2.1-BR, or pAC-U63-QtgRNA2.1-8R</i>       |                                                                     |                             |                      |
| Primer pair 1 forward*                                                                                            | GACCTATTTTCAATTTAACGTCG-(N) <sub>20</sub> -GTTTaaGAGCTAtgctgGAAacag | target sequence 1           | pAC-U63-QtgRNA2.1-BR |
| Primer pair 1 reverse                                                                                             | TTCcagcaTAGCTCTtAAAC-(N) <sub>20</sub> -AGGTTCCACCGAGATTTGAAC       | target sequence 2, Rev Comp |                      |
| <i>II. To make quadruple-gRNA constructs using pAC-U63-gRNA2.1, pAC-U63-QtgRNA2.1-BR, or pAC-U63-QtgRNA2.1-8R</i> |                                                                     |                             |                      |

|                                                                                                         |                                                                                    |                                      |                                      |
|---------------------------------------------------------------------------------------------------------|------------------------------------------------------------------------------------|--------------------------------------|--------------------------------------|
| Primer pair<br>1 forward*                                                                               | GACCTATTTTCAATTTAACGTCG-(N) <sub>20</sub> -GTTT <sub>a</sub> AGAGCTAtgctgGAAAcag   | targeting<br>sequence 1              | pAC-U63-<br>QtgRNA2.1-BR             |
| Primer pair<br>1 reverse                                                                                | (N) <sub>20</sub> -<br>AGGTTCCACCGAGATTTGAAC                                       | targeting<br>sequence 2, Rev<br>Comp |                                      |
| Primer pair<br>2 forward                                                                                | (N) <sub>20</sub> -GTTT <sub>a</sub> AGAGCTAtgctgGAAAcag                           | targeting<br>sequence 2              | pAC-U63-<br>QtgRNA2.1-BR             |
| Primer pair<br>2 reverse                                                                                | (N) <sub>20</sub> -<br>AGGTTCCACCGAGATTTGAAC                                       | targeting<br>sequence 3, Rev<br>Comp |                                      |
| Primer pair<br>3 forward                                                                                | (N) <sub>20</sub> -GTTT <sub>a</sub> AGAGCTAtgctgGAAAcag                           | targeting<br>sequence 3              | pAC-U63-<br>QtgRNA2.1-BR             |
| Primer pair<br>3 reverse                                                                                | TTCcagcaTAGCTCTtAAAC-(N) <sub>20</sub> -<br>AGGTTCCACCGAGATTTGAAC                  | targeting<br>sequence 4, Rev<br>Comp |                                      |
| <i>II. To make CR7T-U6:3 dual-gRNA constructs using pAC-CR7T-gRNA-nlsBFP or pAC-CR7T-gRNA2.1-nlsBFP</i> |                                                                                    |                                      |                                      |
| Primer pair<br>1 forward*                                                                               | ATATGAGTGGAAGACTTTTCG-(N) <sub>20</sub> -<br>GTTT <sub>a</sub> AGAGCTAtgctgGAAAcag | target sequence 1                    | pGC(EF)-U6.3<br>or pGC(2.1)-<br>U6.3 |
| Primer pair<br>1 reverse*                                                                               | TTCcagcaTAGCTCTtAAAC-(N) <sub>20</sub> -<br>CGACGTTAAATTGAAAATAGG                  | target sequence<br>2, Rev Comp       |                                      |

412 \*If the targeting sequence starts with a G, the G can be omitted in the primer. In the reverse primers, C  
413 should be omitted.

414 *UAS-tdTom*: The tdTomato coding sequence was PCR-amplified from pDEST-HemmarR2 (Addgene #  
415 112813) and cloned into EcoRI/XbaI sites of pUA (Addgene 58372).

416 *Gal4-to-Cas9 converter*: Two gRNAs targeting Gal4 (34) were first cloned into pAC-CR7T-gRNA2.1-  
417 nlsBFP using pGC(2.1)-U6.3 as the PCR template, generating pACGC(2.1)-Gal4. Gal4 5' and 3'  
418 homology arms were PCR-amplified using pDEST-APIGH (Addgene # 112804) as the template. Cas9  
419 coding sequence was PCR-amplified using pEDST-APIC-Cas9 (Addgene # 121657) as the template.  
420 These three PCR fragments were assembled together with a gBlock DNA fragment containing a hsp70

421 terminator sequence into PstI/NheI digested pACGC(2.1)-Gal4, resulting in the final construct  
422 pHACK(Gal4)-DONR(T2A-Cas9).

423 Injections were carried out by Rainbow Transgenic Flies (Camarillo, CA 93012 USA) to  
424 transform flies through  $\phi$ C31 integrase-mediated integration into attP docker sites. gRNA expression  
425 vectors were integrated into the *attP<sup>VK00027</sup>* site. *UAS-tdTom* was integrated into the *attP<sup>VK00033</sup>* site. The  
426 Gal4-to-Cas9 converter construct was integrated into *attP<sup>40</sup>* and *attP<sup>VK00027</sup>* sites. Transgenic insertions  
427 were validated by genomic PCR or sequencing.

428 All construct sequences are available upon request.

### 429 **Fertility assays**

430 Virgin females of the indicated genotypes were aged on yeasted food and males were aged on non-  
431 yeasted food, both for 3 to 5 days. They were then mated with *Oregon-R-P2* (ORP2) (46) wildtype  
432 males or virgin females, respectively. Mating was observed and males were removed after a single  
433 mating had completed. Females were allowed to lay eggs in a mating vial for 24 hours and were  
434 transferred to a new vial. They were transferred 3 times before being discarded. Numbers of eggs and  
435 pupae were counted. Egg hatchability was calculated by the number of pupae divided by the number of  
436 eggs.

### 437 **Live Imaging**

438 Live imaging was performed as previously described (28). Briefly, animals were reared at 25°C in  
439 density-controlled vials for between 96 and 120 hours (third to late-third instar). Larvae were mounted  
440 in glycerol and imaged using a Leica SP8 confocal microscope. The images of nuclear EGFP in the  
441 anterior half of third instar larvae were taken using a Nikon SMZ 18 stereomicroscope equipped with an  
442 Andor Zyla 3-Tap sCMOS Camera.

### 443 **Imaginal Disc/Brain imaging**

444 Imaginal disc and larval brain dissections were performed as described previously (47). Briefly,  
445 wandering 3rd instar larvae were dissected in a small petri dish filled with cold PBS. The anterior half of  
446 the larva was inverted and the trachea and gut were removed. The sample was then transferred to 4%  
447 formaldehyde in PBS and fixed for 15 minutes at room temperature. After washing with PBS, the  
448 imaginal discs/brain were placed in SlowFade Diamond Antifade Mountant (Thermo Fisher Scientific)

449 on a glass slide. A coverslip was lightly pressed on top. Discs were imaged using a using a Leica SP8  
450 confocal microscope with a 40X oil objective while brains were imaged with a 20X oil objective.

### 451 **Immunohistochemistry**

452 Following fixation, brains were rinsed and then washed twice at room temperature in PBS with 0.2%  
453 Triton-X100 (PBST) for 20 minutes each. Brains were then blocked in a solution of 5% normal donkey  
454 serum (NDS) in PBST for 1 hour. Brains were then incubated in the blocking solution with a mouse  
455 antibody mouse mAb NC82 (1:100 dilution, Developmental Studies Hybridoma Bank) for 2 hours at  
456 room temperature. Following incubation brains were then rinsed and washed in PBST 3 times for 20  
457 minutes each. Brains were then incubated in a block solution containing a donkey anti-mouse secondary  
458 antibody conjugated with Cy5 (1:400 dilution, Jackson ImmunoResearch) and a rabbit anti-GFP  
459 antibody conjugated with Alexa Fluor 488 (1:500 dilution, Thermo Fisher Scientific) for 2 hours at room  
460 temperature. Brains were then rinsed and washed in PBST 3 times for 20 minutes each and stored at 4°C  
461 until mounting and imaging.

### 462 **Image Analysis and Quantification**

463 Tracing and measurement of C4da dendrites was performed as described previously (Poe et al., 2017).  
464 Briefly, for tracing and measuring C4da dendrites in Fiji/ImageJ, images of dendrites (1,024 X 1,024  
465 pixels) taken with a 20X objective were first processed by Gaussian Blur (Sigma: 0.8) and then Auto  
466 Local Threshold (Phansalkar method, radius: 50). Isolated particles below the size of 120 pixels were  
467 removed by the Particles4 plugin (<http://www.mecourse.com/landinig/software/software.html>). The  
468 dendrites were then converted to single-pixel-width skeletons using the Skeletonize (2D/3D) plugin and  
469 processed using Analyze Skeleton (2D/3D) plugin. The length of skeletons was calculated based on  
470 pixel distance.

471 Quantification of GFP(+) nuclei for the gRNA efficiency comparison was done in ImageJ/Fiji.  
472 ROIs were drawn from the anterior end to the segment A1 on images of the anterior half of third instar  
473 larvae taken using a Nikon SMZ fluorescent stereoscope at 5.2X magnification and 500ms exposure  
474 time. Images were processed using the Fiji subtract background function (rolling radius: 50), Gaussian  
475 Blur (Sigma: 1), and Auto Local Threshold (Phansalkar method, radius: 15). Particles of size above 35  
476 pixels were isolated using the Analyze Particles FIJI function (circularity: 0.4-1.0). The total area of the  
477 selected particles was then divided by the total ROI area to give a percentage area of GFP coverage.

478 Quantification of GFP(+) and BFP(+) nuclei in epidermal cells for the co-CRISPR reliability  
479 assay was done in ImageJ/Fiji. BFP and GFP channels were separately processed to mask labeled nuclei  
480 using subtract background (rolling radius: 60), Gaussian Blur (sigma: 1) and auto local threshold  
481 (Phansalkar method, radius: 50). Particles of size above 80 pixels were counted as nuclei using the  
482 Analyze Particles. Images were then manually curated before quantified.

### 483 **Statistical Analysis**

484 For dendrite length and EGFP(+) area analyses, when groups had equal variance and were normally  
485 distributed, a one-way analysis of variance (ANOVA) was performed followed by a Tukey's honestly  
486 significant difference (HSD) test. When groups had unequal variances, Welch's ANOVA was performed  
487 followed by post-hoc Welch's t-tests with p-values adjusted using the Bonferroni method. Levene's test  
488 was used to compare variances. For BFP-EGFP/EGFP ratio data and hatchability (hatched/not hatched)  
489 data, estimated marginal means (EMMs) contrasts were performed using a generalized linear mixed-  
490 effects models with binomial responses. Invariant groups, from the hatchability data, were compared  
491 using Fisher's Exact Test. For egg laying data, EMMs contrasts were performed for each group based on  
492 a generalized linear model with a negative binomial response. p-values from all EMMs contrasts were  
493 adjusted using the Tukey method. All tests, correlation statistics (Pearson's correlation coefficient), and  
494 linear regression models were generated using R.

495

### 496 **ACKNOWLEDGMENTS**

497 We thank Bloomington *Drosophila* Stock Center (NIH P40OD018537) and KYOTO Stock Center for  
498 fly stocks; Cornell Statistical Consulting Unit (CSCU) for advice on statistics; Michael Goldberg for  
499 critical reading and suggestions on the manuscript. This work was supported by a Cornell start-up fund  
500 and NIH grants (R01NS099125 and R21OD023824) awarded to C.H., R21-HD088744 awarded to  
501 M.F.W..

502

### 503 **AUTHOR CONTRIBUTIONS**

504 G.T.K., Q.H., Y.X., M.F.W., B.W. and C.H. designed research; G.T.K., Q.H., Y.X., Z.Z., and S.A.  
505 performed research; Q.H. and B.W. contributed new reagents/analytic tools; G.T.K., Q.H., Y.X.,  
506 M.F.W., B.W. and C.H. analyzed data; G.T.K., Q.H., Y.X. and C.H. wrote the manuscript; all authors  
507 edited the manuscript; M.F.W. and C.H. acquired funding.



508

509 **DECLARATION OF INTERESTS**

510 The authors declare no competing financial interests.

511

512 **REFERENCES**

- 513 1. Jinek M, *et al.* (2012) A programmable dual-RNA-guided DNA endonuclease in adaptive  
514 bacterial immunity. *Science* 337(6096):816-821.
- 515 2. Iliakis G, *et al.* (2004) Mechanisms of DNA double strand break repair and chromosome  
516 aberration formation. *Cytogenet Genome Res* 104(1-4):14-20.
- 517 3. Lieber MR (2010) The mechanism of double-strand DNA break repair by the nonhomologous  
518 DNA end-joining pathway. *Annu Rev Biochem* 79:181-211.
- 519 4. Harrison MM, Jenkins BV, O'Connor-Giles KM, & Wildonger J (2014) A CRISPR view of  
520 development. *Genes Dev* 28(17):1859-1872.
- 521 5. Port F & Bullock SL (2016) Augmenting CRISPR applications in *Drosophila* with tRNA-flanked  
522 sgRNAs. *Nat Methods* 13(10):852-854.
- 523 6. Port F, Chen HM, Lee T, & Bullock SL (2014) Optimized CRISPR/Cas tools for efficient  
524 germline and somatic genome engineering in *Drosophila*. *Proc Natl Acad Sci U S A*  
525 111(29):E2967-2976.
- 526 7. Brand AH & Perrimon N (1993) Targeted gene expression as a means of altering cell fates and  
527 generating dominant phenotypes. *Development* 118(2):401-415.
- 528 8. Kvon EZ, *et al.* (2014) Genome-scale functional characterization of *Drosophila* developmental  
529 enhancers in vivo. *Nature* 512(7512):91-95.
- 530 9. Pfeiffer BD, *et al.* (2008) Tools for neuroanatomy and neurogenetics in *Drosophila*. *Proc Natl*  
531 *Acad Sci U S A* 105(28):9715-9720.
- 532 10. Delventhal R, *et al.* (2019) Dissection of central clock function in *Drosophila* through cell-  
533 specific CRISPR-mediated clock gene disruption. *Elife* 8.
- 534 11. Schlichting M, Diaz MM, Xin J, & Rosbash M (2019) Neuron-specific knockouts indicate the  
535 importance of network communication to *Drosophila* rhythmicity. *Elife* 8.
- 536 12. Meltzer H, *et al.* (2019) Tissue-specific (ts)CRISPR as an efficient strategy for in vivo screening  
537 in *Drosophila*. *Nat Commun* 10(1):2113.

- 538 13. Poe AR, *et al.* (2019) Robust CRISPR/Cas9-Mediated Tissue-Specific Mutagenesis Reveals  
539 Gene Redundancy and Perdurance in *Drosophila*. *Genetics* 211(2):459-472.
- 540 14. Sapar ML, *et al.* (2018) Phosphatidylserine Externalization Results from and Causes Neurite  
541 Degeneration in *Drosophila*. *Cell Rep* 24(9):2273-2286.
- 542 15. Xue Z, *et al.* (2014) CRISPR/Cas9 mediates efficient conditional mutagenesis in *Drosophila*. *G3*  
543 (*Bethesda*) 4(11):2167-2173.
- 544 16. Garcia-Marques J, *et al.* (2019) Unlimited Genetic Switches for Cell-Type-Specific  
545 Manipulation. *Neuron* 104(2):227-238 e227.
- 546 17. Xie K, Minkenberg B, & Yang Y (2015) Boosting CRISPR/Cas9 multiplex editing capability  
547 with the endogenous tRNA-processing system. *Proc Natl Acad Sci U S A* 112(11):3570-3575.
- 548 18. Zhang Y, *et al.* (2019) A gRNA-tRNA array for CRISPR-Cas9 based rapid multiplexed genome  
549 editing in *Saccharomyces cerevisiae*. *Nat Commun* 10(1):1053.
- 550 19. Nishimasu H, *et al.* (2014) Crystal structure of Cas9 in complex with guide RNA and target  
551 DNA. *Cell* 156(5):935-949.
- 552 20. Chen B, *et al.* (2013) Dynamic imaging of genomic loci in living human cells by an optimized  
553 CRISPR/Cas system. *Cell* 155(7):1479-1491.
- 554 21. Grevet JD, *et al.* (2018) Domain-focused CRISPR screen identifies HRI as a fetal hemoglobin  
555 regulator in human erythroid cells. *Science* 361(6399):285-290.
- 556 22. DeLuca SZ & Spradling AC (2018) Efficient Expression of Genes in the *Drosophila* Germline  
557 Using a UAS Promoter Free of Interference by Hsp70 piRNAs. *Genetics* 209(2):381-387.
- 558 23. Rorth P (1998) Gal4 in the *Drosophila* female germline. *Mech Dev* 78(1-2):113-118.
- 559 24. Hardwick KG & Pelham HR (1992) SED5 encodes a 39-kD integral membrane protein required  
560 for vesicular transport between the ER and the Golgi complex. *J Cell Biol* 119(3):513-521.
- 561 25. Lee JJ, von Kessler DP, Parks S, & Beachy PA (1992) Secretion and localized transcription  
562 suggest a role in positional signaling for products of the segmentation gene hedgehog. *Cell*  
563 71(1):33-50.
- 564 26. Doyle HJ, Kraut R, & Levine M (1989) Spatial regulation of *zerknüllt*: a dorsal-ventral  
565 patterning gene in *Drosophila*. *Genes Dev* 3(10):1518-1533.
- 566 27. Hoch M, Schroder C, Seifert E, & Jackle H (1990) cis-acting control elements for Kruppel  
567 expression in the *Drosophila* embryo. *EMBO J* 9(8):2587-2595.

- 568 28. Poe AR, *et al.* (2017) Dendritic space-filling requires a neuronal type-specific extracellular  
569 permissive signal in *Drosophila*. *Proc Natl Acad Sci U S A* 114(38):E8062-E8071.
- 570 29. Lee T & Luo L (1999) Mosaic analysis with a repressible cell marker for studies of gene  
571 function in neuronal morphogenesis. *Neuron* 22(3):451-461.
- 572 30. McKearin DM & Spradling AC (1990) bag-of-marbles: a *Drosophila* gene required to initiate  
573 both male and female gametogenesis. *Genes Dev* 4(12B):2242-2251.
- 574 31. Blower MD, Daigle T, Kaufman T, & Karpen GH (2006) *Drosophila* CENP-A mutations cause a  
575 BubR1-dependent early mitotic delay without normal localization of kinetochore components.  
576 *PLoS Genet* 2(7):e110.
- 577 32. Freeman M, Nusslein-Volhard C, & Glover DM (1986) The dissociation of nuclear and  
578 centrosomal division in *gnu*, a mutation causing giant nuclei in *Drosophila*. *Cell* 46(3):457-468.
- 579 33. Shamanski FL & Orr-Weaver TL (1991) The *Drosophila* plutonium and pan gu genes regulate  
580 entry into S phase at fertilization. *Cell* 66(6):1289-1300.
- 581 34. Lin CC & Potter CJ (2016) Editing Transgenic DNA Components by Inducible Gene  
582 Replacement in *Drosophila melanogaster*. *Genetics* 203(4):1613-1628.
- 583 35. de Haro M, *et al.* (2010) Detailed analysis of leucokinin-expressing neurons and their candidate  
584 functions in the *Drosophila* nervous system. *Cell Tissue Res* 339(2):321-336.
- 585 36. Foronda D, Martin P, & Sanchez-Herrero E (2012) *Drosophila* Hox and sex-determination genes  
586 control segment elimination through EGFR and extramacrochetæ activity. *PLoS Genet*  
587 8(8):e1002874.
- 588 37. Sinenko SA, Mandal L, Martinez-Agosto JA, & Banerjee U (2009) Dual role of wingless  
589 signaling in stem-like hematopoietic precursor maintenance in *Drosophila*. *Dev Cell* 16(5):756-  
590 763.
- 591 38. Bier E, Harrison MM, O'Connor-Giles KM, & Wildonger J (2018) Advances in Engineering the  
592 Fly Genome with the CRISPR-Cas System. *Genetics* 208(1):1-18.
- 593 39. Port F, *et al.* (2020) A large-scale resource for tissue-specific CRISPR mutagenesis in  
594 *Drosophila*. *Elife* 9.
- 595 40. Zirin J, *et al.* (2020) Large-Scale Transgenic *Drosophila* Resource Collections for Loss- and  
596 Gain-of-Function Studies. *Genetics* 214(4):755-767.
- 597 41. Haeussler M, *et al.* (2016) Evaluation of off-target and on-target scoring algorithms and  
598 integration into the guide RNA selection tool CRISPOR. *Genome Biol* 17(1):148.

- 599 42. Han C, *et al.* (2012) Integrins regulate repulsion-mediated dendritic patterning of drosophila  
600 sensory neurons by restricting dendrites in a 2D space. *Neuron* 73(1):64-78.
- 601 43. Han C, Jan LY, & Jan YN (2011) Enhancer-driven membrane markers for analysis of  
602 nonautonomous mechanisms reveal neuron-glia interactions in Drosophila. *Proc Natl Acad Sci U*  
603 *SA* 108(23):9673-9678.
- 604 44. Han C, *et al.* (2014) Epidermal cells are the primary phagocytes in the fragmentation and  
605 clearance of degenerating dendrites in Drosophila. *Neuron* 81(3):544-560.
- 606 45. Ding AX, *et al.* (2016) CasExpress reveals widespread and diverse patterns of cell survival of  
607 caspase-3 activation during development in vivo. *Elife* 5.
- 608 46. Allis CD, Waring GL, & Mahowald AP (1977) Mass isolation of pole cells from Drosophila  
609 melanogaster. *Dev Biol* 56(2):372-381.
- 610 47. Han C, Belenkaya TY, Wang B, & Lin X (2004) Drosophila glypicans control the cell-to-cell  
611 movement of Hedgehog by a dynamin-independent process. *Development* 131(3):601-611.
- 612
